1 **Full title**

2  
3 **Short-range interactions between fibrocytes and CD8<sup>+</sup> T cells in COPD bronchial**  
4 **inflammatory response**

5  
6  
7  
8 **Short title**

9  
10 **Interactions between fibrocytes and CD8<sup>+</sup> T cells in COPD lungs**

11  
12  
13 **Authors**

14 Edmée Eyraud<sup>1,2</sup>, Elise Maurat<sup>1,2</sup>, Jean-Marc Sac-Epée<sup>3</sup>, Pauline Henrot<sup>1,2,4</sup>, Maeva  
15 Zysman<sup>1,2,4</sup>, Pauline Esteves<sup>1,2</sup>, Thomas Trian<sup>1,2</sup>, Hugues Bégueret<sup>1,2,4</sup>, Pierre-Oliver  
16 Girodet<sup>1,2,4</sup>, Matthieu Thumerel<sup>1,2,4</sup>, Romain Hustache-Castaing<sup>1,2,4</sup>, Roger  
17 Marthan<sup>1,2,4</sup>, Florian Levet<sup>5,6</sup>, Pierre Vallois<sup>3</sup>, Cécile Contin-Bordes<sup>7,8</sup>, Patrick  
18 Berger<sup>1,2,4</sup>, Isabelle Dupin<sup>1,2,\*</sup>

19  
20 **Affiliations**

21  
22 <sup>1</sup>Univ-Bordeaux, Centre de Recherche Cardio-thoracique de Bordeaux, U1045,  
23 Département de Pharmacologie, CIC1401, Pessac, France. <sup>2</sup>INSERM, Centre de  
24 Recherche Cardio-thoracique de Bordeaux, U1045, CIC1401, Pessac, France.  
25 <sup>3</sup>Univ-Lorraine, Institut Elie Cartan de Lorraine, UMR7502, Vandoeuvre-lès-  
26 Nancy, France. <sup>4</sup>CHU de Bordeaux, Service d'exploration fonctionnelle respiratoire,  
27 CIC1401, Pessac, France. <sup>5</sup>Univ. Bordeaux, CNRS, Interdisciplinary Institute for  
28 Neuroscience, IINS, UMR 5297, Bordeaux, France. <sup>6</sup>Univ. Bordeaux, CNRS,  
29 INSERM, Bordeaux Imaging Center, BIC, UAR3420, US 4, Bordeaux, France.  
30 <sup>7</sup>CNRS, UMR5164 ImmunoConcEpT, Université de Bordeaux, Bordeaux, France.  
31 <sup>8</sup>CHU de Bordeaux, Laboratoire d'Immunologie et Immunogénétique, Bordeaux,  
32 France

33  
34  
35 **\* Corresponding author:** Pr Isabelle DUPIN, PhD

36 Centre de recherche Cardio-thoracique de Bordeaux INSERM U1045  
37 PTIB - Hôpital Xavier Arnoz, Avenue du Haut Lévêque, 33600 PESSAC  
38 e-mail: [isabelle.dupin@u-bordeaux.fr](mailto:isabelle.dupin@u-bordeaux.fr)

39 **Abstract**

40 The peri-bronchial zone of chronic obstructive pulmonary disease (COPD) is the site of  
41 extensive infiltration of immune cell, allowing persistent contacts between resident cells  
42 and immune cells. Tissue fibrocytes interaction with CD8<sup>+</sup> T cells and its consequences  
43 were investigated. We show that interactions between both cell types are more frequent in  
44 distal airways from COPD patients compared to those of control subjects. Tissue CD8<sup>+</sup> T  
45 cells from COPD patients promote fibrocyte chemotaxis via the CXCL8-CXCR1/2 axis.  
46 CD8<sup>+</sup> T cells establish short-term interactions with fibrocytes, that trigger CD8<sup>+</sup> T cell  
47 proliferation in a CD54- and CD86-dependent manner, as well as pro-inflammatory  
48 cytokines production. A computational model accurately predicts histological *ex vivo*  
49 characteristics and allows to monitor disease evolution. Overall, our study reveals that local  
50 interactions between fibrocytes and CD8<sup>+</sup> T cells may compromise the balance between  
51 protective immunity and chronic inflammation in bronchi of COPD patients.

52 **Teaser**

53 Fibrocytes/CD8<sup>+</sup> T cells interactions cause inflammation through a maintained

54 pathophysiological loop in bronchi of COPD patients.

55 **MAIN TEXT**

56

57 **Introduction**

58 The prevalence of COPD, one of the most common chronic diseases worldwide, has been  
59 rising in recent decades (1); thus, prevention and treatment of COPD are important issues  
60 of global healthcare. COPD bronchi are an area of intense immunological activity and tissue  
61 remodeling, as evidenced by the extensive immune cell infiltration and changes in tissue  
62 structures such as peribronchial fibrosis. In particular, distal airways are hypothesized to  
63 constitute a “quiet zone”, where exaggerated remodeling and inflammatory processes take  
64 place early in the history of the disease, without identifiable symptoms or lung function tests  
65 alteration (2, 3). In these particular areas, persistent contacts occur between resident cells  
66 and stimulated immune cells migrating from the peripheral circulation to the distal airways.  
67 The relevance of direct contact between T cells and monocyte-macrophages to potentiate  
68 the inflammatory response has been demonstrated in many chronic inflammatory diseases  
69 affecting the central nervous system, osteoarticular structures and the lungs (4), but remains  
70 to be fully investigated in COPD.

71 Fibrocytes, fibroblast-like cells from the monocyte-macrophage lineage, produced by the  
72 bone marrow and released in the peripheral circulation, are recruited in the blood of COPD  
73 patients during an acute exacerbation (5). High circulating fibrocyte count during a COPD  
74 exacerbation is associated with an increased risk of death, suggesting that fibrocytes could  
75 be detrimental to the evolution of this disease (5). We have also demonstrated that tissue  
76 fibrocytes density increases in COPD bronchi, which was associated with a degraded lung  
77 function, increased wall thickness and air trapping (6). However, the function of these  
78 fibrocytes in COPD lungs is not yet fully understood. Besides their role in tissue scarring  
79 matrix production (7) and contraction (8), recruited fibrocytes may participate to lung  
80 inflammation in virtue of their immune properties. They can function as accessory cells in

81 the presentation of antigens to CD4<sup>+</sup> and CD8<sup>+</sup> T lymphocytes (9), and differentiated  
82 fibrocytes display a proteomic signature consistent with a strong engagement into  
83 immunomodulation (10). Cytotoxic CD8<sup>+</sup> T cells are predominant in the airways of COPD  
84 patients and their number inversely correlates with lung function (11). CD8<sup>+</sup> T cell-deficient  
85 mice are protected against lung inflammation and emphysema induced by cigarette smoke  
86 exposure (12) whereas the expression of molecules linked to tissue destruction, such as  
87 perforin, granzyme B and ADAM15, correlate with disease severity (13, 14), suggesting  
88 CD8<sup>+</sup> T cells implication in lung inflammation and destruction in COPD. Activation of  
89 CD8<sup>+</sup> T cells is increased in COPD lung samples and has been shown to be smoking-  
90 independent (15, 16). Other studies have shown that CD8<sup>+</sup> T cell activation could result  
91 from the exposure to self-antigens such as elastin fragments induced by cigarette smoke  
92 exposure (17), and could be partially T Cell Receptor (TCR)-independent (13). The absence  
93 of increased expression of cytotoxic enzyme in peripheral blood CD8<sup>+</sup> T cells from COPD  
94 patients argues in favor of a local activation within the lungs (18). CD8<sup>+</sup> T cells express an  
95 exhausted phenotype in the COPD lung, that may result from an over-activation thus  
96 participating to the defective response to infection in COPD (19, 20). However, CD8<sup>+</sup> T  
97 cells activation's mechanism as well as their precise contribution to COPD pathogenesis  
98 remain largely unknown.

99 A recent study showed that fibrocytes, derived from the blood of lung adenocarcinoma  
100 patients, could strongly enhance the proliferation of CD8<sup>+</sup> T cells (21). We thus  
101 hypothesized that CD8<sup>+</sup> T cells and fibrocytes interact into the lungs, and that this  
102 interaction is critical in COPD pathology. Multiple immunostainings in combination with  
103 specific image analysis methods allow to determine the spatial distribution of individual  
104 CD8<sup>+</sup> T cells and fibrocytes within bronchial tissues of both control subjects and COPD  
105 patients. Using *in vitro* fibrocyte and CD8<sup>+</sup> T cell-based experiments, we studied cell

106 interplay in terms of relative chemotaxis, dynamics, proliferation and cytokine secretion  
107 profile. We then integrated these findings into an agent-based computational model  
108 representing airways from either healthy or COPD patients enabling to test how local  
109 interactions shape spatial distributions of cell in both conditions. We propose that slight  
110 dysregulations of intercellular interactions induce abnormal cell organization around  
111 bronchi, ultimately causing a breakdown of tissue homeostasis, leading to chronic  
112 inflammation and tissue remodeling.

## 113 Results

### 114 **Direct contacts between fibrocytes and CD8<sup>+</sup> T cells are more frequent in distal** 115 **bronchial tissue from COPD patients than in that of controls**

116 We used immunohistochemistry (IHC) to assess whether fibrocytes and CD8<sup>+</sup> T cells were  
117 in close vicinity in human tissue. Sections of distal lung tissues from 17 COPD and 25  
118 control patients were obtained, from a previously described cohort (6), and labeled to detect  
119 CD8<sup>+</sup> T cells, identified as cells positive for CD8 staining and fibrocytes, identified as cells  
120 dual positive for FSP1 and CD45 double staining (fig. S1A-D). In agreement with previous  
121 studies (6, 11, 22), the density of both CD8<sup>+</sup> T cells and fibrocytes was increased within  
122 the subepithelial area of distal bronchi from COPD patients compared with that of control  
123 subjects (Fig. 1A-C). Moreover, fibrocytes and CD8<sup>+</sup> T cells were frequently in close  
124 proximity (Fig. 1D). To quantify the potential for cell–cell contacts, we determined the  
125 density of CD8<sup>+</sup> T cells in interaction with CD45<sup>+</sup> FSP1<sup>+</sup> cells (fig. S1A-D). Whatever the  
126 magnification used to automatically count interacting cells, the density of CD8<sup>+</sup> T cells in  
127 interaction with fibrocytes was higher in the sub-epithelial region of distal bronchi of COPD  
128 patients than in that of control subjects (Fig. 1D-F). For subsequent analyses, we chose the  
129 dilatation size “D8” (3.6 μm, which represents the radius of a mean ideal round cell in our  
130 analysis) to reflect the density of interacting cells. To evaluate the minimal distance between  
131 CD45<sup>+</sup> FSP1<sup>+</sup> cells and neighboring CD8<sup>+</sup> T cells, we used a CD8 distance map generated  
132 from the CD8 staining image, with the brightness of each pixel reflecting the distance from  
133 a CD8<sup>+</sup> T cell (fig. S1E-F). The mean minimal distance between fibrocytes and CD8<sup>+</sup> cells  
134 was significantly smaller in the sub-epithelial region of distal bronchi of COPD patients  
135 than in that of control subjects (Fig. 1G-H). In contrast, the mean minimal distances between  
136 CD8<sup>+</sup> T cells themselves or between fibrocytes themselves were unchanged (fig. S2A-B).  
137 The majority of both CD8<sup>+</sup> T cells and fibrocytes was located beneath the epithelium, with

138 their minimal distance and distribution relatively to the basal membrane being similar in  
139 control and COPD patients (fig. S2C-F). Altogether, no difference of spatial repartition was  
140 observed within each cell population between control and COPD patients, but the relative  
141 distribution of fibrocytes and CD8<sup>+</sup> cells was affected in tissues from patients with COPD.  
142 To further describe the relative spatial organization of both cell types, we used a method  
143 based on Delaunay triangulation computed on previously segmented cell barycenters. It is  
144 based on a custom developed plugin to determine congregations of small groups of cells,  
145 called “clusters” (fig. S3). As expected from our minimal distance analysis, we found  
146 difference neither in the density of single cell-type clusters nor in their size, measured by  
147 the mean number of cells by cluster, between control subjects and patients with COPD (fig.  
148 1I-J, left and middle panels). However, the density of clusters containing both cell types  
149 (“mixed cell clusters”) was higher in distal bronchi of COPD patients than in those of control  
150 subjects, with a median number of 5 and 6 cells in these clusters in control and COPD  
151 tissues, respectively (Fig. 1I-J, right panels). This result indicates that fibrocytes and CD8<sup>+</sup>  
152 T cells are found within close proximity in the peribronchial area of COPD patients, with  
153 possible co-organization of CD8<sup>+</sup> T cells and fibrocytes in mixed cell clusters, indicating  
154 that direct and/or indirect fibrocyte-CD8<sup>+</sup> T cell interactions might occur *in vivo*.

155

### 156 **Relationships between the density of CD8<sup>+</sup> T cells interacting with fibrocytes and** 157 **functional parameters**

158 We determined the univariate correlation coefficients between fibrocyte density, CD8<sup>+</sup> T  
159 cell density, the 3 variables quantifying the interaction of CD8<sup>+</sup> T cells with fibrocytes (the  
160 interacting cell density, the mean minimal distance between fibrocytes and CD8<sup>+</sup> T cells  
161 and the density of mixed cell clusters), and various functional and CT parameters (Tables  
162 S1 to S5). In particular, moderate but significant univariate correlations were found between



163 the Forced Expiratory Volume in 1 second / Forced Vital Capacity (FEV<sub>1</sub>/FVC) ratio (used  
164 to diagnose COPD if below 0.7) and the density of fibrocytes, the density of interacting  
165 cells, the mean minimal distance between fibrocytes and CD8<sup>+</sup> T cells and the density of  
166 fibrocytes-CD8<sup>+</sup> T cells clusters (fig. S4A-D). Variables significantly correlated with  
167 FEV<sub>1</sub>/FVC were entered into stepwise regression analyses in order to find the best model  
168 fitting FEV<sub>1</sub>/FVC. The best model associated the density of interacting cells and the density  
169 of mixed cell clusters. It explained 35% of the FEV<sub>1</sub>/FVC variability (Table S6). The  
170 relationships between the FEV<sub>1</sub>/FVC ratio, the density of interacting cells and the density  
171 of mixed cell clusters were all statistically significant.

### 172 **Chemo-attraction of CD8<sup>+</sup> T cells for fibrocytes is increased in COPD tissue**

174 To decipher the molecular mechanisms underpinning the increased cell-cell interaction in  
175 COPD bronchi, we investigated cell adhesion and chemotaxis processes in CD8<sup>+</sup> T cells of  
176 patients with COPD compared with those of controls. Using the transcriptomic profile of  
177 tissular resident memory and effector memory CD8<sup>+</sup> T cells of COPD patients compared  
178 with that of control subjects in the GSE61397 microarray dataset  
179 (<http://www.ncbi.nlm.nih.gov/geo/>) published elsewhere (23), we noted significative  
180 changes in the abundance of transcripts of genes related to cell adhesion. However, the  
181 changes were not consistent with clear increased or decreased adhesive properties in both  
182 tissue resident memory CD8<sup>+</sup> CD103<sup>+</sup> T-cells (T<sub>RM</sub>) and effector memory CD8<sup>+</sup> CD103<sup>-</sup> T-  
183 cells (T<sub>EM</sub>) (fig. S5). In contrast, transcriptomic data reveal consistent changes in COPD  
184 cells *versus* controls, mostly increases, in chemokines and chemokine receptors (Fig. 2A).  
185 Most changes in transcripts were compatible with a pro-attractive and a pro-migratory  
186 response. In particular, there were increases of CCL2, CCL26, CXCL2 and CXCL8

187 expression in T<sub>RM</sub> from patients with COPD, and CCL3L1 expression in T<sub>EM</sub> from patients  
188 with COPD (Fig. 2A).

189 We then investigated whether tissular CD8<sup>+</sup> T cells secretion from control or COPD patients  
190 could affect fibrocytes migration in an *in vitro* assay (Fig. 2B). CD8<sup>+</sup> T cells were purified  
191 from lung resection material sampled either in control subjects or in COPD patients, whose  
192 characteristics are reported (Table S7). Precursors of fibrocytes were purified from blood  
193 samples of a separate cohort of COPD patients (*i.e.*, COBRA), whose characteristics are  
194 also reported (Table S8). The migration of fibrocytes was significantly increased by  
195 conditioned medium derived from tissular CD8<sup>+</sup> T cells of COPD patients compared with  
196 those from control lungs (Fig. 2C).

197 The secretory profile of these tissular CD8<sup>+</sup> T cells 36h after culture conditions with soluble  
198 anti-CD3 and anti-CD28 antibodies was determined. The concentration of CXCL8 was  
199 increased in CD8<sup>+</sup> T cells from COPD patients compared to control cells (Fig. 2D) in good  
200 agreement with the transcriptomic analysis. By contrast, the concentration of both CCL3  
201 and CCL3L1 was undetectable (data not shown), whereas that of CCL2 and CXCL2  
202 remained unchanged (Fig. 2D). Since CXCL8 is a ligand of the chemokine receptors  
203 CXCR1 and/or CXCR2, we repeated the migration assay with the addition of the drug  
204 reparixin, an antagonist of both CXCR1 and CXCR2 (24). Whereas fibrocyte treatment with  
205 reparixin had no significant effect on the control CD8<sup>+</sup> T cells-mediated migration, it did  
206 inhibit the increased migration induced by the secretions of CD8<sup>+</sup> T cells purified from  
207 COPD tissues (Fig. 2E). Moreover, an anti-CXCL8 blocking antibody also inhibited the  
208 increased migration induced by the secretions of CD8<sup>+</sup> T cells purified from COPD tissues  
209 (Fig. 2F). These data indicate that tissular CD8<sup>+</sup> T cells from patients with COPD promote  
210 fibrocyte chemotaxis via CXCL8-CXCR1/2 axis.

## CD8<sup>+</sup> T cells repeatedly interact with fibrocytes

As fibrocytes and CD8<sup>+</sup> T cells reside in close proximity in the subepithelial area, especially that of tissues from COPD patients, we investigated their crosstalk capacity. We developed an autologous *in vitro* co-culture system allowing precise control over the cell types involved. Fibrocytes and CD8<sup>+</sup> T cells, both purified from blood of COPD patients were co-cultured 2 days before image acquisition for the following 12h. CD8<sup>+</sup> T cells were either nonactivated or activated with anti-CD3/CD28 antibodies coated microbeads. At the beginning of live imaging, nonactivated CD8<sup>+</sup> T cells were equally allocated in fibrocyte-covered zones ( $41 \pm 8\%$ ) and in fibrocyte-free zones ( $59\% \pm 8\%$ ) (Fig. 3A-B). Twelve h later, most ( $77 \pm 9\%$ ) of CD8<sup>+</sup> T cells were present in contact with fibrocytes (Fig. 3A-B). Activation of CD8<sup>+</sup> T cells resulted in similar distribution (Fig. 3A-B). These data suggest that both cell types are able to directly interact, and that these interactions progressively increase during co-culture. We tracked individual CD8<sup>+</sup> T cells during 12h time lapse to capture their spatiotemporal dynamics using multiple variables quantification (Fig. 3C and Movie S1). For both nonactivated and activated lymphocytes, the mean speed of CD8<sup>+</sup> T cells decreased upon contact with fibrocytes (Fig. 3D). Irrespective of the activation state of CD8<sup>+</sup> T cells, a majority of intercellular contacts ( $49 \pm 6\%$  and  $49 \pm 8\%$  for nonactivated and activated CD8<sup>+</sup> T cells, respectively) were short-lived (<12 min) and dynamic, although some longer interactions (>32 min) could also be detected ( $30 \pm 4\%$  and  $27 \pm 7\%$  for nonactivated and activated CD8<sup>+</sup> T cells, respectively) (Fig. 3E). The contact coefficient and the mean velocity of CD8<sup>+</sup> T cells measured in the absence of contact with fibrocytes (“Mean free speed”) were similar in both conditions of activation (Fig. 3F-G). However, we observed a significant decrease in the mean speed for activated CD8<sup>+</sup> T cells when they were in contact with fibrocytes (“Mean contact speed”) compared to nonactivated CD8<sup>+</sup> T cells (Fig. 3H), reflecting subtle behavior changes in this condition of activation.

237

## 238 **Fibrocytes favor CD8<sup>+</sup> T cell proliferation in a cell-cell contact-dependent manner**

239 Since multiple transient contacts have been shown to be an early trigger of events leading  
240 to clonal expansion (25), we wondered whether fibrocytes could promote CD8<sup>+</sup> T cells  
241 proliferation using total cell count and a CellTrace-based co-culture proliferation assay. We  
242 designed two different co-culture assays modeling either a direct contact between the two  
243 cell types or an indirect contact (transwell assay). The activation of CD8<sup>+</sup> T cells by anti-  
244 CD3/CD28 antibody coated microbeads slightly increased the basal level of dividing CD8<sup>+</sup>  
245 T cells (comparison of the conditions “CD8<sub>NA</sub>” and “CD8<sub>A</sub>” without fibrocytes in Fig. 3I-  
246 P). The presence of fibrocytes in the indirect co-culture assay did not affect proliferation  
247 capacity of non-activated CD8<sup>+</sup> T cells and only moderately increased the number of  
248 dividing activated CD8<sup>+</sup> T cells (Fig. 3 I-L). The distinction between naïve (CD45RA<sup>+</sup>) and  
249 memory (CD45RA<sup>-</sup>) CD8<sup>+</sup> T cells did not reveal any selective effect of fibrocytes on these  
250 two CD8<sup>+</sup> subpopulations (fig. S6A, C and S6E-H). In the direct co-culture model, the total  
251 number of CD8<sup>+</sup> T cells and the percentage of dividing CD8<sup>+</sup> T cells were far higher in the  
252 presence of fibrocytes irrespective of the activation state of CD8<sup>+</sup> T cells (Fig. 3M-P). This  
253 effect seemed to be particularly impressive for naïve CD8<sup>+</sup> T cells as they demonstrated an  
254 average differential of  $80 \pm 14\%$  and  $70 \pm 20\%$  of dividing cells between the conditions  
255 with and without fibrocytes, respectively for nonactivated (fig. S6I-J, top panels) and  
256 activated CD8<sup>+</sup> T cells (fig. S6I-J, bottom panels), *vs*  $67 \pm 18\%$  and  $52 \pm 20\%$  for memory  
257 CD8<sup>+</sup> T cells (fig. S6K-L). Altogether, this implies that a direct rather than indirect  
258 interactions between CD8<sup>+</sup> T cells and fibrocytes increased CD8<sup>+</sup> T cell proliferation.

259 After 6 days of co-culture, a cell population with a low level of CD8 expression (CD8<sup>low</sup>)  
260 appeared, that was inversely proportional to the level of CD8<sup>+</sup> T cells strongly expressing a  
261 high level of CD8 (CD8<sup>high</sup>, fig. S7). The CellTrace-based assay showed that those cells

262 highly proliferated during co-culture, especially in the direct co-culture (fig. S7E),  
263 suggesting that CD8<sup>high</sup> cells disappeared in favor of CD8<sup>low</sup> cells. As fibrocytes could have  
264 contaminated the cell suspension harvested from the direct co-culture, we did check that  
265 those CD8<sup>low</sup> cells were not CD45<sup>+</sup> Collagen I<sup>+</sup> (fig. S8). Phenotypic analysis of this CD8<sup>low</sup>  
266 population indicated that cells were mostly CD45RA<sup>-</sup> cells (fig. S7A-B, S7D-E), with a low  
267 level of cytokine expression (fig. S7C, F). Since CD8<sup>low</sup> cells may thus represent a  
268 population of exhausted T cells, we focused on CD8<sup>high</sup> cells in the following, especially  
269 regarding the secretion profile characterization. As CD86 and CD54 co-stimulatory  
270 molecule and adhesion molecule, respectively, pivotal in immunological synapse formation,  
271 are both expressed by fibrocytes (21, 26), we tested the effects of anti-CD54 and anti-CD86  
272 blocking antibodies on fibrocyte-induced proliferation of CD8<sup>+</sup> T cells. The inhibition of  
273 CD86 and CD54 significantly reduced proliferation of nonactivated CD8<sup>+</sup> T cells in the  
274 direct co-culture with fibrocytes (Fig. 4). However, these antibodies failed to alter the  
275 stimulatory activity of lymphocyte division by fibrocytes, when CD8<sup>+</sup> T cells were  
276 previously activated (Fig. 4). Blocking LFA-1 did not affect the fibrocyte-mediated CD8<sup>+</sup>  
277 T cell division (fig. S9A-D), suggesting the existence of compensatory integrins at the  
278 surface of the lymphocyte, such as CD11b/CD18, to mediate the interaction with CD54.  
279 The inhibition of CD44, a receptor for hyaluronan which has been shown to be produced by  
280 fibrocytes (27), did not impair the proliferation of CD8<sup>+</sup> T cells irrespective of their  
281 activation state (fig. S9E-H).

282 In total, these results indicate that direct contacts between fibrocytes and CD8<sup>+</sup> T cells, such  
283 as those mediated by CD54 and CD86, were strong positive signals to trigger CD8<sup>+</sup> T cell  
284 proliferation with the induction of CD8<sup>high</sup> and CD8<sup>low</sup> phenotypes.

### 285 286 **Fibrocyte-CD8<sup>+</sup> T cell interactions alter cytokine production**

287 Multiparametric flow cytometry was used to characterize the cytokine expression profile of  
288 CD8<sup>+</sup> T cells in the indirect and direct co-culture with fibrocytes. When nonactivated CD8<sup>+</sup>  
289 T cells were indirect co-cultured with fibrocytes, the expression of TNF- $\alpha$ , IFN- $\gamma$  by CD8<sup>+</sup>  
290 T cells was slightly increased (Fig. 5A-B). IL-10, IL-17 and Granzyme B were not detected  
291 (Fig. 5A-B). When CD8<sup>+</sup> T cells were activated with anti-CD3/CD28, the level of TNF- $\alpha$   
292 and IFN- $\gamma$  further increased, and the expression of granzyme B and IL-10 was slightly  
293 induced (Fig. 5A-B). Upon direct co-culture, we observed a massive induction of TNF- $\alpha$ ,  
294 IFN- $\gamma$ , granzyme B, IL-10 and IL-17, irrespective of the activation state of CD8<sup>+</sup> T cells  
295 (Fig. 5C-D). Altogether, these results show that soluble factors and direct contacts between  
296 fibrocytes and CD8<sup>+</sup> T cells might have an additive effect on CD8<sup>+</sup> T cell cytokine  
297 production. The concentration of TNF- $\alpha$  measured in culture supernatant increased  
298 significantly upon co-culture between fibrocytes and non-activated CD8<sup>+</sup> T cells at day 4,  
299 confirming that TNF- $\alpha$  was secreted in the medium upon direct interactions with fibrocytes  
300 (Fig. 5E). This shows that both soluble factors produced by fibrocytes and direct contacts  
301 influence CD8<sup>+</sup> T cell secretion profile.

302 We then wondered whether glucocorticoid drugs (*i.e.*, budesonide or fluticasone propionate)  
303 could reverse the fibrocyte-induced proliferation and differentiation of CD8<sup>+</sup> T cells.  
304 Treatment with glucocorticoid drugs significantly decreased fibrocyte-induced TNF- $\alpha$   
305 secretion by non-activated CD8<sup>+</sup> T cells, without affecting the proliferation (fig. S10).  
306 Collectively, these results underline the importance of the interaction with fibrocytes for  
307 CD8<sup>+</sup> T cell activation, possibly by favoring cellular proliferation and local cytokine  
308 production.

287  
288  
289  
290  
291  
292  
293  
294  
295  
296  
297  
298  
299  
300  
301  
302  
303  
304  
305  
306  
307  
308  
309  
310

311 **Stochastic mathematical model taking into account intercellular interactions describes**  
312 **the evolution over time of cell populations in control and COPD bronchi**

313 All the above mentioned results led us to hypothesize that fibrocyte infiltration into the lung,  
314 differential migration of fibrocytes towards CD8<sup>+</sup> T cells and subsequent CD8<sup>+</sup> T cell  
315 proliferation, could result in a distinct spatial cellular repartition observed in tissues  
316 obtained from patients with COPD, compared to control tissues. To investigate this  
317 hypothesis, which could not be experimentally tested, we developed an agent-based  
318 (cellular automata) model with local and random cellular interactions. We considered the  
319 lamina propria (*i.e.*, the peribronchial zone), located between the bronchial epithelium and  
320 the smooth muscle layer, which contains fibrocytes and CD8<sup>+</sup> T cells. In line with the  
321 present analysis, the computational domain (*i.e.*, the lamina propria), corresponds to a zone  
322 of 179 000  $\mu\text{m}^2$ . Fibrocytes and CD8<sup>+</sup> T cell are considered as individual objects that can  
323 move, divide, die and infiltrate the lamina propria at the stable state and during exacerbation.  
324 Their individual behaviors and interactions are supposed to be stochastic and the value of  
325 the probabilities has been established from literature (5, 6, 10, 21, 28–41) and the present *in*  
326 *vitro* data, as summarized in the method section and in Tables S9 and S10, and exhaustively  
327 described in the supplementary text and (42). Initial cell densities were scaled with respect  
328 to reference values, corresponding to the mean densities measured in non-smoking subjects.  
329 Simulations started with these initial densities and ended 20 years later, to reflect the average  
330 time between the beginning of cigarette smoke exposure and COPD onset (43).

331 All the biological processes are governed by probabilities (Fig. 6A). CD8<sup>+</sup> T cells, but not  
332 fibrocytes, are able to proliferate, based on our own unpublished observations and other  
333 studies (10, 34). The presence of fibrocytes in the local neighborhood of a CD8<sup>+</sup> T cell can  
334 trigger CD8<sup>+</sup> T cell division with increased probability, based on the present *in vitro*  
335 experiments showing that the contact between those two cell types greatly enhanced CD8<sup>+</sup>

336 T cell proliferation. Fibrocytes and CD8<sup>+</sup> T cells movements depend on the local  
337 neighborhood of cells, reflecting their relative chemo-attractive properties. We then  
338 simulated the evolution over 20 years, with two sets of parameters, respectively for the  
339 control and COPD cases and the second for the COPD case (see supplementary text).

340 We first tested the results of simulations against our experimental data from patients'  
341 tissues. First, we compared cell densities, experimentally measured in tissue samples, with  
342 theoretical predictions at the final state. Snapshots of the peribronchial area at the end of the  
343 simulations show that the densities of cells as well as their relative distribution were  
344 different between healthy and COPD situations (Fig. 6B). From the simulations (n=160 in  
345 each condition), we found a median of 754 CD8<sup>+</sup> T cells/mm<sup>2</sup> (95% CI, 748 to 763) and  
346 106 fibrocytes/mm<sup>2</sup> (95% CI, 101 to 108) in the control situation, and 1187 CD8<sup>+</sup> T  
347 cells/mm<sup>2</sup> (95% CI, 1169 to 1195) and 212 fibrocytes/mm<sup>2</sup> (95% CI, 206 to 216) in the  
348 COPD situation. These values are in very good agreement with our experimental findings,  
349 and the simulations were also able to reproduce the statistical increase of cell densities in  
350 COPD situation compared to that of controls (Fig. 6C). Next, we tested if our theory  
351 accounted for the experimental relative distribution of CD8<sup>+</sup> T cells and fibrocytes. The  
352 densities of CD8<sup>+</sup> T cells in interaction with fibrocytes (Fig. 6D), the mean minimal  
353 distances between fibrocytes and CD8<sup>+</sup> cells (Fig. 6E), the distribution of mean minimal  
354 distances (fig. S11) and the mean number of mixed cell clusters (Fig. 6F) were in good  
355 agreement with tissular analyses and mimicked the variations observed between control  
356 subjects and patients with COPD. The densities of mixed cell clusters predicted by  
357 simulations (control simulations: median = 17 clusters/mm<sup>2</sup> (95% CI, 18 to 21), COPD  
358 simulations: median = 45 clusters/mm<sup>2</sup> (95% CI, 46 to 51), P<0.001) agreed perfectly with  
359 experimental measurements (Fig. 6G) and were therefore chosen as a readout of intercellular  
360 interactions in the following analyses. If purely random, the density of mixed clusters was



361 expected to be 28 clusters/ $\mu\text{m}^2$  (95% CI, 25 to 29) and 73 clusters/ $\mu\text{m}^2$  (95% CI, 70 to 74)  
362 in control and COPD situations, respectively (fig. S12). These random densities as well as  
363 the others parameters quantifying the relative distribution of cells were statistically different  
364 from the distributions obtained in both simulations and *in situ* analyses (fig. S12). We  
365 conclude that the relative organization of CD8<sup>+</sup> T cells and fibrocytes in control and COPD  
366 bronchi did not result from a pure stochastic mechanism but implicates chemotaxis  
367 processes.

368 One of the strengths of the model is to allow the monitoring of the temporal evolution of  
369 the different cellular processes and the numerical detection of a change of regime (Fig.  
370 6H-I). CD8<sup>+</sup> T cells infiltration remained identical in control and COPD situation.  
371 Fibrocyte-induced T cell proliferation, that represents the minor part of the total  
372 proliferation in control situation, quickly increased in COPD situation over time to reach a  
373 plateau after approximately 4 years. As the basal proliferation of CD8<sup>+</sup> T cells remained  
374 similar in healthy and diseased situations, the resulting total proliferation in CD8<sup>+</sup> T cells  
375 over time was higher in the COPD situation compared to the control one. COPD dynamics  
376 also affected CD8<sup>+</sup> T cell death, with a concomitant increase of T cell-induced death. In  
377 total, the net balance between gain and loss of CD8<sup>+</sup> T cells was around zero for control  
378 dynamics and strictly positive for COPD dynamics, explaining the increased CD8<sup>+</sup> T cell  
379 density in COPD simulations. Fibrocytes infiltration remained very similar in control and  
380 COPD dynamics (Fig. 6I). Fibrocytes death was initially lower in COPD simulations before  
381 increasing and reaching a stationary state after approximately 7 years, resulting in a net  
382 expansion of fibrocytes population in COPD bronchi after 20 years. Moreover, the  
383 simulations allowed us to monitor the interactions between fibrocytes and CD8<sup>+</sup> T cells.  
384 The density of mixed cell clusters gradually increased in the first years of the COPD  
385 simulation before reaching a stationary state after approximately 6 years (Fig. 6J, Movies

386 S2 to S5). Altogether, the theory of the influence of local interactions tested by our agent-  
387 based (cellular automata) model correctly accounts for the shift of absolute and relative  
388 distribution of CD8<sup>+</sup> T cells and fibrocytes in peribronchial areas from control subjects to  
389 patients with COPD.

390  
391 The above results constitute a validation of our model since for the different parameters  
392 considered, there is agreement between the simulations and the *in vitro* observations

## 393 394 395 **Discussion**

396 The present study aimed at identifying the role and mechanism of fibrocyte-CD8<sup>+</sup> T cells  
397 cross-talk in COPD. A previous study had pointed out a pivotal role for fibrocyte to activate  
398 CD8<sup>+</sup> T cells proliferation (21). However, whether and how both cell types could interact  
399 in bronchi, as well as their implication in COPD was completely unknown. Quantitative  
400 image analysis provided crucial insight into the relative distribution of fibrocytes and CD8<sup>+</sup>  
401 T cells in distal bronchial specimens from control subjects and COPD patients. In addition  
402 to data from previous studies demonstrating that the densities of both fibrocytes (6) and  
403 CD8<sup>+</sup> T cells (41) are increased within the distal bronchi of COPD patients, we found that  
404 fibrocyte and CD8<sup>+</sup> T cells are localized in close proximity in peribronchial areas, especially  
405 in tissues from patients with COPD. We deciphered the spatiotemporal characteristics of  
406 these cell–cell contacts by live imaging in an *in vitro* autologous co-culture assay, and  
407 showed that the duration of the contacts was compatible with activation through the  
408 establishment of dynamic synapses. On the one hand, CD8<sup>+</sup> T cells induced fibrocyte  
409 chemotaxis, and, on the other hand, fibrocytes directly induced CD8<sup>+</sup> T cell proliferation  
410 and cytokine production. The strength of our work relies on the integration of findings from

411 the present *in vitro* experiments and other studies into a comprehensive computational  
412 model that provides an accurate prediction of histological *ex vivo* characteristics opening up  
413 the possibility to figure out the *in vivo* effect of drugs in future studies. Altogether, our data  
414 suggest a pivotal role for fibrocytes to activate CD8<sup>+</sup> T cell deleterious functions in the  
415 context of COPD.

416  
417 We analyzed the relationship between these histological parameters and clinical data and  
418 found associations between fibrocyte presence, fibrocyte-CD8<sup>+</sup> T cell interaction and the  
419 alteration of lung function. We have demonstrated using stepwise and multivariate  
420 regressions that the density of interacting cells and the density of mixed cell cluster were  
421 the two best correlated parameters with the FEV<sub>1</sub>/FVC ratio, supporting a potential role for  
422 the interplay between both cell types in COPD. Since regions of microscopic  
423 emphysematous destruction of terminal bronchioles have been associated with increased  
424 infiltration of CD8<sup>+</sup> T cells and immune response activation, such as the up-regulation of  
425 IFN- $\gamma$  signaling (44), it is tempting to speculate that fibrocyte-CD8<sup>+</sup> T cell interplay could  
426 be implicated in early changes leading to tissue remodeling and chronic inflammation in  
427 COPD. Of note, the gene signature obtained by tissue microarray associated with this site  
428 also indicates the modification of two genes associated with the tissue repair process, FGF10  
429 and TGFB2 (44). Considering the possible effect of CD8<sup>+</sup> T cells on fibrocyte  
430 differentiation, it could be worthwhile to focus on these genes in further studies.

431  
432 We also addressed the potential mechanisms explaining these increased interactions of  
433 CD8<sup>+</sup> T cells and fibrocytes in tissues of COPD patients. Chemotaxis could guide CD8<sup>+</sup> T  
434 cells towards fibrocytes and reciprocally, as it has been proposed for T cells towards  
435 dendritic cells (45–47). Stronger or longer interactions could also explain the differential

436 spatial distribution between healthy and diseased tissues. On the other hand, the contact  
437 between both cell types could also occur through a stochastic mechanism, as shown for  
438 CD4<sup>+</sup> T cells and dendritic cells in lymph nodes, without any implication of chemotactic  
439 processes (48). Although we cannot totally rule out a role for fibrocyte-CD8<sup>+</sup> T cell adhesion  
440 to explain the increased interactions, our findings rather suggest a central role for the  
441 CXCL8-CXCR1/2 axis in promoting encounters between CD8<sup>+</sup> T cells and fibrocytes in  
442 COPD patients. Importantly, this is further supported by the results of computational  
443 modelization, which only integrates chemotaxis and not adhesion processes, revealing a  
444 final spatial repartition of cells in the COPD situation distinct from a random distribution.  
445 Altogether, our data suggest that the likelihood of interactions between fibrocytes and CD8<sup>+</sup>  
446 T cells could be increased in tissues from patients with COPD through the CXCL8-  
447 CXCR1/2 axis thus participating to cluster fibrocytes and CD8<sup>+</sup> T cells in diseased tissues.  
448 Importantly, dual blockers of CXCR1-CXCR2 have been suggested as therapeutic targets  
449 in COPD (49) and are efficient in our *in vitro* experiments to block the increased chemotaxis  
450 of fibrocytes towards secretion of CD8<sup>+</sup> T cells purified from COPD tissues. The outcome  
451 of such therapies could be predicted using the computational model described in this study.

452  
453 We show that fibrocytes act as a major promoter on CD8<sup>+</sup> T cell proliferation, thus  
454 confirming, in an autologous co-culture system, what has been previously found in the  
455 context of cancer-related immunity (21). This is consistent with the present *in situ* analyses,  
456 showing the presence of clusters containing both cell types in peribronchial area, especially  
457 in the tissues from patients with COPD. The mean numbers of cells in those clusters  
458 remained relatively low, suggesting that these structures are distinct from inducible  
459 bronchus-associated lymphoid tissue (iBALT) (50). Although a previous report has  
460 demonstrated that fibrocytes, exposed to viral antigens, could induce proliferation of naïve

461 CD8<sup>+</sup> T cells (26), the pro-proliferative effect exerted by fibrocytes on CD8<sup>+</sup> T cells  
462 occurred without antigen exposure in our *in vitro* study. This antigen-independent T cell  
463 proliferation driven by fibrocytes was also found in the context of sepsis (51), suggesting  
464 that fibrocytes generally impact T cells expansion with a mechanism independent of the  
465 traditional antigen-driven clonal proliferation. This is also in agreement with our findings  
466 showing that contacts between CD8<sup>+</sup> T cells and fibrocytes were relatively short and  
467 dynamic, and that the dynamics of the interaction did not depend on the activation state of  
468 CD8<sup>+</sup> T cells. The spatiotemporal behavior of CD8<sup>+</sup> T cells was consistent with the  
469 establishment of dynamic synapse, also called “kinapse” (52), which are associated with the  
470 induction of relatively weak TCR signals (53). We have evidenced the requirement for  
471 cellular contacts, implicating the surface receptors CD86 and CD54. The lack of effect of  
472 the anti-CD86 and CD54 in pre-activated CD8<sup>+</sup> T cells might indicate potential changes of  
473 expression of molecules belonging to the immunological synapse upon activation, that could  
474 make the lymphocytes more responsive to others signals. The well-known inhaled  
475 corticosteroids (*i.e.*, budesonide and fluticasone propionate) also failed to significantly  
476 inhibit fibrocyte-induced CD8<sup>+</sup> T cell proliferation. This is consistent with their lack of  
477 activity in lymphocytes obtained from patients with COPD (54). In contrast, we propose  
478 that targeting the interaction between structural and immune cells and/or its consequences  
479 should reveal robust candidates for future pharmacotherapeutic strategies to treat COPD. Of  
480 note, the stimulatory activity of CD8<sup>+</sup> T cells by fibrocytes was also found to be enhanced  
481 by the blockade of the PD-1/PD-L1 pathway in a previous study (21). As this latter property  
482 of fibrocytes may be beneficial in tumor microenvironment (55), especially when cancer  
483 patients were treated with anti-PD-1/PD-L1 antibody, it might be rather detrimental in  
484 COPD patients, by promoting tissue damages and chronic immune inflammation.

486 Fibrocytes skewed CD8<sup>+</sup> T-cell populations towards both CD8<sup>high</sup> and CD8<sup>low</sup> phenotypes  
487 in a cell–cell contact independent manner. It has been described that, following contact  
488 between an antigen presenting cell and a lymphocyte, asymmetric division can occur  
489 generating a memory cell, weakly expressing CD8, and an effector cell strongly expressing  
490 CD8 (56, 57). The asymmetry is reduced but still present even without specific recognition  
491 of foreign antigen by T cells (57). It is tempting to speculate that the induced proliferation  
492 we observed in our experiments generates, via asymmetric division, unequal CD8  
493 inheritance in daughter cells. The low level of cytokine expression in CD8<sup>low</sup> cells is  
494 compatible with an exhausted phenotype, while CD8<sup>high</sup> cells express higher levels of  
495 cytokines, a profile consistent with an effector commitment. Although the presence of the  
496 CD8<sup>high</sup> and CD8<sup>low</sup> subsets remain to be evidenced in the tissues, we suspect that the  
497 relative expansion of the CD8<sup>high</sup> and CD8<sup>low</sup> subset triggered by fibrocytes could have  
498 functional implications. Reiterative rounds of CD8<sup>+</sup> T cells division induced by frequent  
499 interactions with fibrocytes might induce defective immune response by exhausted CD8<sup>low</sup>  
500 T cells (19, 20), and tissue destruction by cytotoxic CD8<sup>high</sup> cells (12, 58).

501  
502 In COPD, outside of exacerbations, factors triggering pro-inflammatory cytokines  
503 production are still elusive. Here, we demonstrate that fibrocytes exert a strong effect  
504 through soluble factors and direct cellular contacts with CD8<sup>+</sup> T cells, inducing a massive  
505 upregulation of TNF- $\alpha$ , IFN- $\gamma$  and granzyme B production, all implicated in COPD  
506 pathophysiology (59). Greater production of TNF- $\alpha$ , IFN- $\gamma$  and granzyme B by CD8<sup>+</sup> T  
507 cells triggered by the interaction with fibrocytes is consistent with previous studies showing  
508 enhanced production of Tc1 cytokines and cytotoxic molecules by CD8<sup>+</sup> T cells purified  
509 from patients with COPD (13, 60, 61), suggesting that local interactions with cells such as  
510 fibrocytes may play a pivotal role in CD8 polarization in COPD. In particular, TNF- $\alpha$  has

511 proinflammatory and prooxidative actions (62), and its overexpression has been associated  
512 with emphysema (63). TNF- $\alpha$  can directly contribute to cytolysis, together with the  
513 cytotoxic granzyme B (64) and in synergy with IFN- $\gamma$  (65). TNF- $\alpha$  can also indirectly  
514 participate to extracellular matrix degradation through the induction of matrix  
515 metalloproteinases (66). Simultaneously, the production of the pro-fibrotic IL-17 was also  
516 induced upon co-culture with fibrocytes, raising the possibility that the interaction between  
517 CD8<sup>+</sup> T cells and fibrocyte participates to the generation of IL-17-secreting CD8<sup>+</sup> T cells in  
518 airways of patients with COPD (67). Interestingly, IL-17 is able to simulate matrix  
519 components synthesis in other cell types, including fibrocytes, and promotes CD40-  
520 mediated IL-6 production by fibrocytes (68). Cooperative interactions between fibrocytes  
521 and CD8<sup>+</sup> T cells, through tissue destruction and abnormal matrix components synthesis,  
522 may thus directly contribute to the loss of normal lung function. On the other hand, CD8<sup>+</sup> T  
523 cell production of anti-inflammatory cytokines such as IL-10, was also stimulated upon co-  
524 culture with fibrocytes. In total, rather than the net production of each cytokine, it is  
525 probably the balance or imbalance between pro-inflammatory and anti-inflammatory  
526 molecules that will dictate the outcome of the inflammatory process.

527  
528 Whereas the field of respiratory research is rapidly moving towards an exhaustive  
529 description of modifications of molecular and cellular components in diseased lungs, the  
530 actual transition between a healthy to a diseased state, although critical, remains very  
531 difficult to investigate. We developed here a probabilistic cellular automata type model to  
532 explore of dynamic behaviors and interactions between fibrocytes and CD8<sup>+</sup> T cells.  
533 Previous agent-based computational approaches have been used to describe the switch from  
534 normal to allergic response (69) and airway remodeling in asthma (70), but, to our  
535 knowledge, this type of modeling was never applied to COPD. Qualitative estimates of

536 probabilities that govern cell death, proliferation, infiltration and displacement are derived  
537 from experimental data from our study and others. We could simulate spatiotemporal  
538 behaviors of cells in the lamina propria over long period of time (*i.e.*, 20 years) and we  
539 showed that this model can accurately reproduce the absolute and relative repartition of  
540 fibrocytes and CD8<sup>+</sup> T cells in both control and COPD situations.

541 Although simulated and *in situ* data were close, the variances of *in silico* data were smaller  
542 than the *in situ* measurements, which can be probably explained by the fact that cell diversity  
543 and interactions are far more complex than those considered in this model. Nevertheless, it  
544 appears that (i) our model captures important aspect of reality, and (ii) modifications of  
545 specific cellular processes and local interactions, *i.e.* fibrocyte-induced CD8<sup>+</sup> T cell  
546 proliferation and fibrocyte attraction towards CD8<sup>+</sup> T cells, are sufficient to reproduce the  
547 shift of histological composition between the control and COPD situations. This theoretical  
548 approach and associated simulations allowed us to validate the key hypothesis of  
549 modification of local interactions, and to show that the specific values of the COPD  
550 parameters led to an increased cell density and the spatial patterns observed in patients with  
551 COPD. The simulations made it possible to follow over time various quantities of interest  
552 and to empirically determine the time when the stationary state is achieved, that would be  
553 difficult to reveal in any other way. Given the consistency of our results with those from the  
554 literature, our model provides a unique opportunity to decipher the dynamics of increased  
555 interactions between the two cell types as well as the infinite possibility to investigate  
556 therapeutic strategies.

557  
558 The present *in vitro* model has limitations, including the use of circulating cells for some *in*  
559 *vitro* experiments and the difficulty in extrapolating results obtained from these assays to *in*  
560 *vivo* processes. However, we took this limit into account in our modelization approach, by



561 using a combination of our experiments and measurements obtained in tissues, to accurately  
562 determine the dedicated parameters (42). Even if computational modelization was done in  
563 2D, whereas the bronchi are 3D structures, we believe that our model is representative as it  
564 mimics the cellular distribution of normal and pathological airways, that was also quantified  
565 in 2D lung sections. Besides this, some quantitative features of our approach are still valid  
566 in 3D, such as the probabilities that govern cell death, proliferation and infiltration, whereas  
567 others are expected to change with dimensionality, such as displacement rules.

568  
569 From our study and others (71, 72), it is now clear that the fate of CD8<sup>+</sup> T cells in distal  
570 airways may depend on multiple successive interactions with different cell types, including  
571 fibrocytes. We believe that targeting interaction between structural and immune cells should  
572 be considered in future drug discovery programs and that computational modelization  
573 should help to refine drug priority.

## 574 **Materials and Methods**

### 575 **Study Populations**

576 Lung tissues for the *in situ* study were obtained from a previously described cohort (6).  
577 Briefly, subjects more than 40 years of age were eligible for enrolment if they required  
578 thoracic lobectomy surgery for cancer (pN0), lung transplantation or lung volume reduction.  
579 A total of 17 COPD patients with a clinical diagnosis of COPD according to the GOLD  
580 guidelines (73) and 25 non-COPD subjects (“control subjects”) with normal lung function  
581 testing (*i.e.*, FEV<sub>1</sub>/FVC > 0.70) and no chronic symptoms (cough or expectoration) were  
582 recruited from the University Hospital of Bordeaux.

583 Lung tissues for the purification of tissular CD8<sup>+</sup> T cells were obtained from a separate  
584 cohort of patients. A total of 17 patients with COPD and 23 nonsmokers were prospectively  
585 recruited from the University Hospital of Bordeaux, according to the GOLD guidelines (73)  
586 (Table S7). Fragments of distal parenchyma from all subjects were obtained by either  
587 lobectomy or transplantation.

588 To study fibrocyte- CD8<sup>+</sup> T cells interplay *in vitro*, blood samples were obtained from a  
589 separate cohort of COPD patients, (*i.e.*, COBRA (Bronchial Obstruction and Asthma  
590 Cohort; sponsored by the French National Institute of Health and Medical Research,  
591 INSERM), as outpatients in the Clinical Investigation Centre of the University Hospital of  
592 Bordeaux (Table S8).

593 All subjects gave their written informed consent to participate to the studies. The studies  
594 received approval from the local or national ethics committees.

595

### 596 **Identification of bronchial fibrocytes and CD8<sup>+</sup> T cells**

597 Fragments of distal parenchyma were obtained from macroscopically normal lung resection  
598 or transplantation material. The samples were embedded in paraffin and sections of 2.5 µm

599 thick were cut, as described previously (6). Sections were deparaffinized through three  
600 changes of xylene and through graded alcohols to water. Heat induced antigen retrieval was  
601 performed using citrate buffer, pH 6 (Fisher Scientific, Illkirch, France) at 96°C in a Pre-  
602 Treatment Module (Agilent, Les Ulis, France). Endogenous peroxidases were blocked for  
603 10 min using hydrogen peroxide treatment (Agilent). Nonspecific binding was minimized  
604 by incubating the sections with 4% Goat Serum (Agilent) for 30 min, before CD8 staining,  
605 and before the double staining for CD45 and FSP1. First, the sections were stained with  
606 rabbit anti-CD8 monoclonal antibody (Fisher Scientific) during 45 min, and then incubated  
607 with HRP anti-Mouse (Agilent). Immunoreactivity was detected by using the DAB System  
608 (Agilent). Second, the same sections were stained with mouse anti-CD45 monoclonal  
609 antibody (BD Biosciences, San Jose, CA) overnight and then with rabbit anti-FSP1  
610 polyclonal antibody (Agilent) during 45 min. They were incubated with Alexa568-  
611 conjugated anti-Mouse and with Alexa488-conjugated anti-Rabbit (Fisher Scientific)  
612 antibodies. Immunoreactivity was detected by fluorescence for FSP1 and CD45 staining.  
613 The sections were imaged using a slide scanner Nanozoomer 2.0HT with fluorescence  
614 imaging module (Hamamatsu Photonics, Massy, France) using objective UPS APO 20X  
615 NA 0.75 combined to an additional lens 1.75X, leading to a final magnification of 35X.  
616 Virtual slides were acquired with a TDI-3CCD camera. Fluorescent acquisitions were done  
617 with a mercury lamp (LX2000 200W - Hamamatsu Photonics) and the set of filters adapted  
618 for DAPI, Alexa 488 and Alexa 568. Bright field and fluorescence images were acquired  
619 with the NDP-scan software (Hamamatsu) and processed with ImageJ.  
620 Quantification of CD8<sup>+</sup> T cells was performed, as described in fig. S1A, C. A color  
621 deconvolution plugin was used on brightfield image to isolate the signal corresponding to  
622 DAB staining. A binary threshold was applied to this grayscale image, followed by a  
623 watershed transformation to the segmented image to separate potential neighboring cells

624 (fig. S1C). CD8<sup>+</sup> T cells were then automatically counted by recording all the positive  
625 particles with an area greater than 64  $\mu\text{m}^2$ . This threshold was empirically determined on  
626 our images to select positive cells. Quantification of dual positive cells for FSP1 and CD45  
627 was performed, as described in Fig. 1B, D. A binary threshold was applied to fluorescence  
628 images corresponding to FSP1 and CD45 stainings. These images were combined using the  
629 “AND” function of the Fiji “Image Calculator” to select cells dual positive for FSP1 and  
630 CD45 double staining (fig. S1D). This was followed by a watershed transformation to  
631 separate potential neighboring cells. These CD45<sup>+</sup> FSP1<sup>+</sup> cells were then automatically  
632 counted by recording all the positive particles with an area greater than 64  $\mu\text{m}^2$ .

633  
634 **Quantification of the density of CD8<sup>+</sup> T cells, FSP1<sup>+</sup> CD45<sup>+</sup> cells and CD8<sup>+</sup> T cells in**  
635 **interaction with CD45<sup>+</sup> FSP1<sup>+</sup> cells**

636 This latter segmented image was then used to quantify CD8<sup>+</sup> T cells in interaction with  
637 CD45<sup>+</sup> FSP1<sup>+</sup> cells as described in Fig. 1E: each CD8 positive particle with an area greater  
638 than 64  $\mu\text{m}^2$  was enlarged using the dilatation function (4, 8, 10 and 15 pixels dilatation:  
639 used to count the cells respectively less than 1.8, 3.6, 4.5 and 6.8  $\mu\text{m}$  apart). This modified  
640 image was combined with the segmented image for dual CD45 FSP1 positive staining using  
641 the “AND” function of the Fiji “Image Calculator” to select CD8<sup>+</sup> T cells in interaction with  
642 CD45<sup>+</sup> FSP1<sup>+</sup> cells. These interacting cells were automatically counted by recording all the  
643 positive particles. The lamina propria contour was manually determined on bright field  
644 image and the area was calculated. For distal bronchi, the lumen area was also determined  
645 and only bronchi less than 2 mm in diameter were analyzed as described previously (74).  
646 The densities of CD8<sup>+</sup> T cells, FSP1<sup>+</sup> CD45<sup>+</sup> cells and interacting cells were defined by the  
647 ratio between the number of positive cells in the lamina propria divided by lamina propria

648 area. Tissue area and cell measurements were all performed in a blinded fashion for patients'  
649 characteristics.

650

### 651 **Quantification of the minimal distances between CD45<sup>+</sup> FSP1<sup>+</sup> cells and CD8<sup>+</sup> T cells**

652 The segmented image produced from the DAB staining image was inverted, and a CD8  
653 distance map was built from the latter image (fig. S1F). As a result, the brighter the pixel,  
654 the closer the distance from a CD8<sup>+</sup> T cell. Conversely, the darker the pixel, the farther away  
655 the distance from a CD8<sup>+</sup> T cell. On the binary image produced from FSP1 and CD45  
656 staining images, dual positive cells for FSP1 and CD45 were selected in the lamina propria.  
657 Each area corresponding to a FSP1<sup>+</sup> CD45<sup>+</sup> cell was reported on the CD8 distance map, and  
658 the minimal gray value in each area was measured and converted to a distance, allowing to  
659 measure the minimal distance between the CD45<sup>+</sup> FSP1<sup>+</sup> cell and neighboring CD8<sup>+</sup> T cells.  
660 For each patient, a frequency distribution of all minimal distances (with 7  $\mu$ m binning) and  
661 the mean minimal distance were calculated.

662

### 663 **Quantification of cell clusters**

664 On the segmented image with dual CD45 FSP1 positive staining combined with CD8  
665 positive staining, centroids from positive particles located in the lamina propria were  
666 connected by a Delaunay triangulation, using a custom freely available ImageJ plugin (75)  
667 (fig. S3A-C, [https://github.com/flevet/Delaunay\\_clustering\\_ImageJ](https://github.com/flevet/Delaunay_clustering_ImageJ)). All triangles sharing  
668 one edge with the ROI defining the lamina propria were removed (fig. S3C, left panel). On  
669 the remaining triangulation a distance threshold, corresponding to the minimal mean  
670 distance between fibrocytes and CD8<sup>+</sup> T cells (40  $\mu$ m) was applied, allowing to select the  
671 connections with a distance lower than the threshold distance (fig. S3C, right panel). The  
672 number of clusters and their composition were then automatically recorded.

673

## 674 **Fibrocyte and CD8<sup>+</sup> T cell purification**

675 Peripheral blood mononuclear cells (PBMCs) were first separated from the whole blood by  
676 Ficoll-Hypaque (Eurobio Scientific, Les Ulis, France) density gradient centrifugation. Cells  
677 were washed twice in cold PBS containing 0.5% bovine serum albumin (BSA, Sigma-  
678 Aldrich, Saint Quentin-Fallavier, France) and 2 mM Ethylene Diamine Tetra-acetic Acid  
679 (EDTA, Invitrogen, Cergy Pontoise, France). CD8<sup>+</sup> T cells were purified by positive  
680 selecting using CD8 microbeads (Miltenyi Biotec, Paris, France). CD8<sup>+</sup> T cells were  
681 washed in a buffered solution (“CTL-Wash™”, Cellular Technology Limited, Bonn,  
682 Germany) and resuspended in a serum-free freezing media (“CTL-Cryo™ Medium”,  
683 Cellular Technology Limited, Bonn, Germany) for cryopreservation of freshly-isolated  
684 CD8<sup>+</sup> T cells during fibrocyte differentiation. The CD8<sup>+</sup> T cells-depleted cell fraction was  
685 then depleted from CD3<sup>+</sup> cells using CD3 microbeads (Miltenyi Biotec). Cell suspension  
686 containing fibrocyte precursors was cultured during at least 14 days to induce fibrocyte  
687 differentiation: a total of 2.10<sup>6</sup> cells resuspended in 1 ml DMEM (Fisher Scientific, Illkirch,  
688 France), containing 4.5 g/l glucose and glutaMAX, supplemented with 20% fetal calf serum  
689 (Biowest, Riverside, USA), penicillin/streptomycin and MEM non-essential amino acid  
690 solution (Sigma-Aldrich), was added to each well of a 12 well plate. After one week in  
691 culture, fibrocyte differentiation was induced by changing the medium for a serum-free  
692 medium. Mediums were changed every 2-3 days.

693

## 694 **Fibrocyte/CD8<sup>+</sup> T cells co-culture assay**

695 One day before co-culture, CD8<sup>+</sup> T cells were thawed. A buffer solution previously heated  
696 to 37°C (PBS 1X with 0.5% BSA and 2mM EDTA) was added to the cell suspension. CD8<sup>+</sup>  
697 T cells were washed with PBS and resuspended in DMEM supplemented with 8% fetal calf

698 serum for a final concentration of  $0.5 \cdot 10^6$  cells/mL. CD8<sup>+</sup> T cells were either stimulated  
699 with a low dose of CD3 antibody ( $3 \mu\text{g} / 10^6$  cells) to promote cell survival without  
700 stimulating cell proliferation (“non-activated” condition), or stimulated overnight with anti-  
701 CD3/CD28 coated microbeads (Fisher Scientific) with a bead-to-cell ratio of 1:1  
702 (“activated” condition). At day 0 (co-culture), these beads were removed, CD8<sup>+</sup> T cells were  
703 stained with  $5 \mu\text{M}$  CellTrace Violet (Fisher Scientific) in case of proliferation experiments,  
704 before being added to fibrocyte cultures ( $0.5 \cdot 10^6$  CD8<sup>+</sup> T cells/well). In blocking  
705 experiments, the antibodies (Abs) directed against LFA-1 (clone HI111, BioLegend,  
706  $1 \mu\text{g}/\text{mL}$ ), CD54 (clone HA58, eBioscience), CD86 (clone IT2.2, eBioscience,  $10 \mu\text{g}/\text{mL}$ ) or  
707 CD44 (clone 82102, Biotechne,  $10 \mu\text{g}/\text{mL}$ ) were used with their respective control Abs,  
708 mIgG1  $\kappa$  (clone MOPC-21, BioLegend), mIgG2b  $\kappa$  (eBM 2b, eBioscience), mIgG2B  
709 (133303, Biotechne). In LFA-1 and CD44 blocking experiments as well as in glucocorticoid  
710 drugs experiments, CD8<sup>+</sup> T cells were preincubated respectively with corresponding Abs,  
711 budesonide or fluticasone propionate ( $10^{-8}\text{M}$ , MedChemExpress) at  $37^\circ\text{C}$  for 1h before  
712 being added to fibrocytes. In CD54 and CD86 blocking experiments, fibrocytes were  
713 preincubated with corresponding Abs at  $37^\circ\text{C}$  for 1h before adding CD8<sup>+</sup> T cells. For  
714 indirect co-culture, CD8<sup>+</sup> T cells were cultured in  $0.4 \mu\text{m}$  transwell inserts (Sigma-Aldrich)  
715 for 12-well plates.

716

### 717 **Live imaging**

718 For time-lapse microscopy, cells were imaged after 2 days of co-culture, at  $37^\circ\text{C}$  and with  
719 5% CO<sub>2</sub> on an inverted DMI8 stand microscope (Leica, Microsystems, Wetzlar, Germany)  
720 equipped with a Flash 4.0 sCMOS camera (Hamamatsu, Japan). The objective used was a  
721 HC PL FL L 20X dry 0.4 NA PH1. The multi-positions were done with a ASI MS-2000-  
722 500 motorized stage (Applied Scientific Instrumentation, Eugene, USA). The  $37^\circ\text{C}/5\% \text{CO}_2$

723 atmosphere was created with an incubator box and an gaz heating system (Pecon GmbH,  
724 Erbach, Germany). This system was controlled by MetaMorph software (Molecular  
725 Devices, Sunnyvale, USA). Phase contrast images were collected every 2 min for 12h.  
726 Image analysis and measurements were performed with the ImageJ software. Using the  
727 plugin "Cell counter " of the Fiji software, the number of CD8<sup>+</sup> T cells in direct contact with  
728 a fibrocyte as well as the number of free CD8<sup>+</sup> T cells were manually counted at the  
729 beginning of the acquisition and after 12 hours of acquisition. Cell tracking was performed  
730 using the "Manual Tracking" plugin of the Fiji software to determine the durations of  
731 contacts between tracked CD8<sup>+</sup> T cell with fibrocytes and the frequency of contact. A  
732 contact was defined manually by a direct interaction between CD8<sup>+</sup> T cell and fibrocyte.  
733 Five numerical variables were collected to characterize CD8<sup>+</sup> T cell dynamic over time. The  
734 mean speed corresponded to the track length divided by the time of tracking duration. The  
735 mean free speed corresponded the length of the track when the T cell was not interacting  
736 with any other cell, divided by the time spent free. The mean contact speed corresponded to  
737 the length of the track when the T cell is in contact with a fibrocyte, divided by the time  
738 spent in contact. For each T cell and for each contact, a contact time was defined as the time  
739 spent in contact until the T cell becomes free again. Then, each T cell can have many contact  
740 times with fibrocytes. The contact coefficient was defined by the proportion of time the T  
741 cell was in contact with a fibrocyte divided by the time of tracking duration.

### 742

### 743 **CD8<sup>+</sup> T cell characterization by flow cytometry**

744 Four or 6 days after co-culture, CD8<sup>+</sup> T cells were harvested and manually counted before  
745 being processed for FACS analysis. Intracellular cytokines were assessed following  
746 stimulation with PMA (25 ng/ml, Sigma-Aldrich), ionomycin (1 $\mu$ M, Sigma-Aldrich) for 4h  
747 and brefeldin A (5 $\mu$ g/ml, Sigma-Aldrich) for the last 3 h. Cells were stained with anti-CD8-



748 PerCP-Vio700, anti-CD45-RA-FITC, and then fixed, permeabilized using the IntraPrep  
749 Permeabilization Reagent Kit (Beckman Coulter) and stained with anti-Granzyme-APC,  
750 anti-TNF- $\alpha$ -PE, anti-IFN- $\gamma$ -APC, anti-IL-17- PE-Cy7, anti-IL-10-PE or isotype controls  
751 (Miltenyi Biotech, Paris, France). The percentage of cell proliferation was estimated using  
752 Cell Trace Violet fluorescence loss. FACS data were acquired using a Canto II 4-Blue 2-  
753 Violet 2-Red laser configuration (BD Biosciences). Flow cytometry analysis were  
754 performed using Diva 8 (BD Biosciences). Human TNF- $\alpha$  concentration levels were  
755 quantified using ELISA following manufacturer's recommendations (BioTechne). Values  
756 below the detection limit were counted as zero.

### 757

### 758 **Dataset transcriptomic analysis**

759 The microarray data of tissular CD8<sup>+</sup> T cells was downloaded from the Gene Expression  
760 Omnibus (<http://www.ncbi.nlm.nih.gov/geo/>) using a dataset under the accession code  
761 GSE61397. Differential expression analysis between patients with COPD and control  
762 subjects was performed using the GEO2R interactive web tool. Heatmaps of the expression  
763 profiles for genes related to cell adhesion and chemotaxis were visualized with Graphpad  
764 Prism 6 software.

### 765

### 766 **Tissular CD8<sup>+</sup> T cell purification, culture and secretion profile analyses**

767 After lung parenchyma resection from control or COPD patients, samples were finely  
768 chopped at room temperature using scissors and then enzymatically dissociated with 40  
769 IU/mL of collagenase (ThermoFisher) in DMEM medium for 45 min at 37°C. The  
770 enzymatic reaction was stopped by adding HBSS medium (Hank's Balanced Salt Solution)  
771 without calcium and supplemented with 2mM EDTA (Invitrogen, Cergy Pontoise, France).  
772 The cell suspension was filtered twice using 100  $\mu$ m gauze and 70  $\mu$ m cell strainer (Fisher

773 Scientific). Tissue CD8<sup>+</sup> T cells were purified by positive selection using CD8 microbeads  
774 (Miltenyi Biotech, Paris, France). Then, tissue CD8<sup>+</sup> T cells were resuspended in DMEM  
775 supplemented with 8% fetal calf serum, soluble anti-CD3 and anti-CD28 antibodies  
776 (respectively 1 µg and 3 µg for 10<sup>6</sup> cells) for a final concentration of 0.5 x 10<sup>6</sup> cells/mL. After  
777 36h, supernatants from tissue CD8<sup>+</sup> T cells were collected and frozen, for migration  
778 experiments or for further analyses. Supernatants from different samples obtained either  
779 from non-smoking subjects or patients from COPD were pooled for migration experiments.  
780 Supernatant concentration of CXCL8 was measured using ELISA (BioTechne). CCL26,  
781 CXCL2 and CCL2 concentrations were measured by using a customized Bio-Plex Assay  
782 (BioRad, Hercules, CA), using special plate reader (Bio-Plex 200 Systems, BioRad) and  
783 software (Bio-Plex manager), according to the manufacturer's instruction.

### 784 **Fibrocyte migration**

786 Fibrocyte precursors were isolated from peripheral blood as described previously (5).  
787 Fibrocyte migration was assessed using a modified Boyden chamber assay. The transwell  
788 inserts (pore size 8 µm, Dutscher) and the wells were coated for 1h at room temperature  
789 with poly-lysine-ethylene glycol (PEG-PLL, SuSoS, Dübendorf, Switzerland) to prevent  
790 cell adhesion. A total of 0.3 x 10<sup>6</sup> NANT cells resuspended in 0.2 ml DMEM, containing  
791 4.5 g/l glucose and L-glutamine, supplemented with penicillin/streptomycin and MEM non-  
792 essential amino acid solution were added to the upper compartment of each well. When  
793 indicated, NANT cells were pretreated for 30 min at 37°C with 200nM reparixin (MedChem  
794 Express), an antagonist of CXCR1-2. Supernatants of tissue CD8<sup>+</sup> T cells from non-  
795 smoking control subjects or COPD patients were added to the bottom compartment of each  
796 well. When indicated, supernatants were pretreated for 30 min at 37°C with blocking Ab  
797 against CXCL8 (clone 6217, BioTechne, 1 µg/mL) or respective control Ab. After 12h, the

798 content of bottom compartment was removed and DAPI staining was performed to exclude  
799 dying cells. Cells were then fixed, permeabilized and stained with anti-Collagen Type I-  
800 FITC (Sigma Aldrich), anti-CD45-APC (BD Pharmingen), anti-CXCR1-PE and anti-  
801 CXCR2-APC-Cy7 (Miltenyi Biotec, Paris, France). Fibrocyte migration was assessed by  
802 flow cytometry using double labeling CD45-Collagen I. To obtain absolute values of  
803 migratory cells, flow cytometric counts for each condition were obtained during a constant  
804 predetermined time period (1 min). The fraction of migratory fibrocytes was defined as the  
805 number  $CD45^+ Col1^+$  cells counted in the bottom chamber divided by the number of total  
806 added cells. These values were normalized to the fraction of migratory fibrocytes obtained  
807 in the control condition.

808

### 809 **The mathematical model**

810 Exhaustive description of the mathematical model is provided in the supplementary text.

811 To understand the interaction between fibrocyte and  $CD8^+$  T cells in the spatial cellular  
812 organization in the peribronchial area, we constructed a discrete time cellular automata  
813 model. Two agent types are introduced -  $CD8^+$  T cell agents and fibrocytes agents, denoted  
814 C and F respectively. C and F cells evolve on a lattice in two-dimensions. We take as surface  
815 of interest a zone with a crown shape, containing 3 652 lattice sites corresponding to a total  
816 area of approximately  $179\ 000\ \mu\text{m}^2$ , which is in agreement with our *in situ* measurements.  
817 Reflecting (zero-flux) boundary conditions are imposed at the external and internal borders.  
818 On each site, there is at most one cell. The lattice is initially randomly seeded with both F  
819 and C cells at densities corresponding at the mean distribution of non-smokers subjects,  
820 reflecting the “healthy” situation :  $n_0(C) = 660\ \text{cells}/\text{mm}^2$ , and  $n_0(F) = 106\ \text{cells}/\text{mm}^2$ . This  
821 corresponds to an average value of  $N_0(C) = 118$  C cells and  $N_0(F) = 19$  F cells.

822 We assumed that for a healthy subject as for a patient with COPD, the same model can be  
823 applied but with different parameters. These parameters are estimated thanks to experiments  
824 and data from the literature (see supplementary text and (42) for a complete description,  
825 Table S10 for numerical values).

826 The notations and parameters of the mathematical model are summarized in Table S9 and  
827 their numerical values are given in Table S10. We now describe the behavior of the cells  
828 and their interactions. F and C cells infiltrate into the peribronchial area at the stable state  
829 with the respective probabilities  $p_{istaF}$  and  $p_{istaC}$ , and during exacerbation, a supplementary  
830 infiltration can occur, each year, with the probability  $p_{iexaF}$  (resp.  $p_{iexaC}$ ). In the model, C  
831 cells can proliferate with a very low probability  $p_C$ , but the presence of F cells in the local  
832 neighborhood of a C cell can induce C cell division with increased probability  $p_{C/F}$ , based  
833 on our own results and another study (21). We suppose that fibrocytes do not proliferate, as  
834 shown by our own *in vitro* observations (data not shown) and other studies (10, 34). F and  
835 C cells can move, with probabilities which are determined by the results from chemotaxis  
836 experiments (Fig. 2). F and C cells die with a "basal" probability  $p_{dC}$  (respectively  $p_{dF}$ ). C  
837 cells also die with an increased probability  $p_{dC+}$  when the considered C cell has many other  
838 C cells in its neighborhood, in agreement with previous data (28). Some of the probabilities  
839 are independent of the local environment ( $p_{istaF}$ ,  $p_{istaC}$ ,  $p_{iexaF}$ ,  $p_{iexaC}$ ,  $p_C$ ), the other ones  
840 being dependent of the local environment ( $p_{C/F}$ ,  $p_{dC+}$  and displacement probabilities) (Fig.  
841 6A).

842 Each simulation represents a total duration of 20 years and is divided into 3 504 000  
843 iterations, of 3 minutes each. Each type of simulation is performed 160 times. This time  
844 period allowed the investigation of COPD development.. At the final state (20 years), the  
845 total numbers of F and C cells, the densities of C cells in interaction with F cells, the minimal

846 distances between C and F cells, and the number and composition of clusters were quantified  
847 in the control and COPD situations.

## 849 **Statistical analyses**

850 Statistical significance, defined as  $P < 0.05$ , was analyzed by t-tests and MANOVA for  
851 variables with parametric distribution, and by Kruskal-Wallis with multiple comparison z  
852 tests, Mann-Whitney tests, Wilcoxon tests and Spearman correlation coefficients for  
853 variables with non-parametric distribution, with Graphpad Prism 6 software. RStudio  
854 software was used to perform stepwise regression and multivariate regression analyses.

## 858 **References**

- 860 1. D. M. Mannino, A. S. Buist, Global burden of COPD: risk factors, prevalence, and future  
861 trends. *Lancet*. **370**, 765–773 (2007).
- 862 2. J. Mead, The Lung's Quiet Zone. *New England Journal of Medicine*. **282**, 1318–1319  
863 (1970).
- 864 3. J. C. Hogg, J. Williams, J. B. Richardson, P. T. Macklem, W. M. Thurlbeck, Age as a Factor  
865 in the Distribution of Lower-Airway Conductance and in the Pathologic Anatomy of Obstructive  
866 Lung Disease. *New England Journal of Medicine*. **282**, 1283–1287 (1970).
- 867 4. J.-M. Dayer, How T-lymphocytes are activated and become activators by cell-cell  
868 interaction. *European Respiratory Journal*. **22**, 10s–15s (2003).
- 869 5. I. Dupin, B. Allard, A. Ozier, E. Maurat, O. Ousova, E. Delbrel, T. Trian, H.-N. Bui, C.  
870 Dromer, O. Guisset, E. Blanchard, G. Hilbert, F. Vargas, M. Thumerel, R. Marthan, P.-O. Girodet,  
871 P. Berger, Blood fibrocytes are recruited during acute exacerbations of chronic obstructive  
872 pulmonary disease through a CXCR4-dependent pathway. *J. Allergy Clin. Immunol.* **137**, 1036-  
873 1042.e7 (2016).
- 874 6. I. Dupin, M. Thumerel, E. Maurat, F. Coste, E. Eyraud, H. Begueret, T. Trian, M.  
875 Montaudon, R. Marthan, P.-O. Girodet, P. Berger, Fibrocyte accumulation in the airway walls of  
876 COPD patients. *Eur. Respir. J.* **54** (2019), doi:10.1183/13993003.02173-2018.
- 877 7. R. Bucala, L. A. Spiegel, J. Chesney, M. Hogan, A. Cerami, Circulating fibrocytes define a  
878 new leukocyte subpopulation that mediates tissue repair. *Mol Med.* **1**, 71–81 (1994).
- 879 8. P. Henrot, E. Eyraud, E. Maurat, S. Point, G. Cardouat, J.-F. Quignard, P. Esteves, T. Trian,  
880 P.-O. Girodet, R. Marthan, M. Zysman, P. Berger, I. Dupin, Muscarinic receptor M3 activation  
881 promotes fibrocytes contraction. *Frontiers in Pharmacology*. **13** (2022) (available at  
882 <https://www.frontiersin.org/articles/10.3389/fphar.2022.939780>).

- 883 9. I. Dupin, C. Contin-Bordes, P. Berger, Fibrocytes in Asthma and Chronic Obstructive  
884 Pulmonary Disease: Variations on the Same Theme. *Am. J. Respir. Cell Mol. Biol.* **58**, 288–298  
885 (2018).
- 886 10. C. Ling, K. Nishimoto, Z. Rolfs, L. M. Smith, B. L. Frey, N. V. Welham, Differentiated  
887 fibrocytes assume a functional mesenchymal phenotype with regenerative potential. *Sci Adv.* **5**,  
888 eaav7384 (2019).
- 889 11. T. C. O'Shaughnessy, T. W. Ansari, N. C. Barnes, P. K. Jeffery, Inflammation in bronchial  
890 biopsies of subjects with chronic bronchitis: inverse relationship of CD8+ T lymphocytes with  
891 FEV1. *Am J Respir Crit Care Med.* **155**, 852–857 (1997).
- 892 12. T. Maeno, A. M. Houghton, P. A. Quintero, S. Grumelli, C. A. Owen, S. D. Shapiro, CD8+  
893 T Cells are required for inflammation and destruction in cigarette smoke-induced emphysema in  
894 mice. *J Immunol.* **178**, 8090–8096 (2007).
- 895 13. C. M. Freeman, M. K. Han, F. J. Martinez, S. Murray, L. X. Liu, S. W. Chensue, T. J. Polak,  
896 J. Sonstein, J. C. Todt, T. M. Ames, D. A. Arenberg, C. A. Meldrum, C. Getty, L. McCloskey, J.  
897 L. Curtis, Cytotoxic potential of lung CD8+ T cells increases with COPD severity and with in vitro  
898 stimulation by IL-18 or IL-15. *J Immunol.* **184**, 6504–6513 (2010).
- 899 14. X. Wang, D. Zhang, A. Higham, S. Wolosianka, X. Gai, L. Zhou, H. Petersen, V. Pinto-  
900 Plata, M. Divo, E. K. Silverman, B. Celli, D. Singh, Y. Sun, C. A. Owen, ADAM15 expression is  
901 increased in lung CD8+ T cells, macrophages, and bronchial epithelial cells in patients with COPD  
902 and is inversely related to airflow obstruction. *Respiratory Research.* **21**, 188 (2020).
- 903 15. E. Roos-Engstrand, B. Ekstrand-Hammarström, J. Pourazar, A. F. Behndig, A. Bucht, A.  
904 Blomberg, Influence of smoking cessation on airway T lymphocyte subsets in COPD. *COPD.* **6**,  
905 112–120 (2009).
- 906 16. J. Wang, R. A. Urbanowicz, P. J. Tighe, I. Todd, J. M. Corne, L. C. Fairclough, Differential  
907 activation of killer cells in the circulation and the lung: a study of current smoking status and chronic  
908 obstructive pulmonary disease (COPD). *PLoS One.* **8**, e58556 (2013).
- 909 17. J.-S. Zhou, Z.-Y. Li, X.-C. Xu, Y. Zhao, Y. Wang, H.-P. Chen, M. Zhang, Y.-F. Wu, T.-W.  
910 Lai, C.-H. Di, L.-L. Dong, J. Liu, N.-X. Xuan, C. Zhu, Y.-P. Wu, H.-Q. Huang, F.-G. Yan, W. Hua,  
911 Y. Wang, W.-N. Xiong, H. Qiu, T. Chen, D. Weng, H.-P. Li, X. Zhou, L. Wang, F. Liu, X. Lin, S.-  
912 M. Ying, W. Li, M. Imamura, M. E. Choi, M. R. Stampfli, A. M. K. Choi, Z.-H. Chen, H.-H. Shen,  
913 Cigarette smoke-initiated autoimmunity facilitates sensitisation to elastin-induced COPD-like  
914 pathologies in mice. *European Respiratory Journal.* **56** (2020), doi:10.1183/13993003.00404-  
915 2020.
- 916 18. M. C. Morissette, J. Parent, J. Milot, Perforin, granzyme B, and FasL expression by  
917 peripheral blood T lymphocytes in emphysema. *Respiratory Research.* **8**, 62 (2007).
- 918 19. R. T. McKendry, C. M. Spalluto, H. Burke, B. Nicholas, D. Cellura, A. Al-Shamkhani, K.  
919 J. Staples, T. M. A. Wilkinson, Dysregulation of Antiviral Function of CD8+ T Cells in the Chronic  
920 Obstructive Pulmonary Disease Lung. Role of the PD-1–PD-L1 Axis. *Am J Respir Crit Care Med.*  
921 **193**, 642–651 (2016).
- 922 20. S. Grundy, J. Plumb, S. Lea, M. Kaur, D. Ray, D. Singh, Down regulation of T cell receptor  
923 expression in COPD pulmonary CD8 cells. *PLoS One.* **8**, e71629 (2013).
- 924 21. T. Afroj, A. Mitsushashi, H. Ogino, A. Saijo, K. Otsuka, H. Yoneda, M. Tobiume, N. T.  
925 Nguyen, H. Goto, K. Koyama, M. Sugimoto, O. Kondoh, H. Nokihara, Y. Nishioka, Blockade of



- 926 PD-1/PD-L1 Pathway Enhances the Antigen-Presenting Capacity of Fibrocytes. *J Immunol* (2021),  
927 doi:10.4049/jimmunol.2000909.
- 928 22. M. Saetta, A. Di STEFANO, G. Turato, F. M. Facchini, L. Corbino, C. E. Mapp, P.  
929 Maestrelli, A. Ciaccia, L. M. Fabbri, CD8+ T-Lymphocytes in Peripheral Airways of Smokers with  
930 Chronic Obstructive Pulmonary Disease. *Am J Respir Crit Care Med*. **157**, 822–826 (1998).
- 931 23. P. Hombrink, C. Helbig, R. A. Backer, B. Piet, A. E. Oja, R. Stark, G. Brassler, A. Jongejan,  
932 R. E. Jonkers, B. Nota, O. Basak, H. C. Clevers, P. D. Moerland, D. Amsen, R. A. W. van Lier,  
933 Programs for the persistence, vigilance and control of human CD8+ lung-resident memory T cells.  
934 *Nat Immunol*. **17**, 1467–1478 (2016).
- 935 24. R. Bertini, M. Allegretti, C. Bizzarri, A. Moriconi, M. Locati, G. Zampella, M. N.  
936 Cervellera, V. Di Cioccio, M. C. Cesta, E. Galliera, F. O. Martinez, R. Di Bitondo, G. Troiani, V.  
937 Sabbatini, G. D’Anniballe, R. Anacardio, J. C. Cutrin, B. Cavalieri, F. Mainiero, R. Strippoli, P.  
938 Villa, M. Di Girolamo, F. Martin, M. Gentile, A. Santoni, D. Corda, G. Poli, A. Mantovani, P.  
939 Ghezzi, F. Colotta, Noncompetitive allosteric inhibitors of the inflammatory chemokine receptors  
940 CXCR1 and CXCR2: prevention of reperfusion injury. *Proc Natl Acad Sci U S A*. **101**, 11791–  
941 11796 (2004).
- 942 25. R. Obst, The Timing of T Cell Priming and Cycling. *Frontiers in Immunology*. **6** (2015)  
943 (available at <https://www.frontiersin.org/article/10.3389/fimmu.2015.00563>).
- 944 26. C. Balmelli, N. Ruggli, K. McCullough, A. Summerfield, Fibrocytes are potent stimulators  
945 of anti-virus cytotoxic T cells. *J Leukoc Biol*. **77**, 923–933 (2005).
- 946 27. L. Bianchetti, M. Barczyk, J. Cardoso, M. Schmidt, A. Bellini, S. Mattoli, Extracellular  
947 matrix remodelling properties of human fibrocytes. *J Cell Mol Med*. **16**, 483–495 (2012).
- 948 28. S. Zenke, M. M. Palm, J. Braun, A. Gavrillov, P. Meiser, J. P. Böttcher, N. Beyersdorf, S.  
949 Ehl, A. Gerard, T. Lämmermann, T. N. Schumacher, J. B. Beltman, J. C. Rohr, Quorum Regulation  
950 via Nested Antagonistic Feedback Circuits Mediated by the Receptors CD28 and CTLA-4 Confers  
951 Robustness to T Cell Population Dynamics. *Immunity*. **52**, 313-327.e7 (2020).
- 952 29. P. Mrass, S. R. Oruganti, G. M. Fricke, J. Tafoya, J. R. Byrum, L. Yang, S. L. Hamilton,  
953 M. J. Miller, M. E. Moses, J. L. Cannon, ROCK regulates the intermittent mode of interstitial T cell  
954 migration in inflamed lungs. *Nat Commun*. **8**, 1010 (2017).
- 955 30. S. R. McMaster, J. J. Wilson, H. Wang, J. E. Kohlmeier, Airway-Resident Memory CD8 T  
956 Cells Provide Antigen-Specific Protection against Respiratory Virus Challenge through Rapid IFN-  
957  $\gamma$  Production. *J Immunol*. **195**, 203–209 (2015).
- 958 31. L. Siena, M. Gjomarkaj, J. Elliot, E. Pace, A. Bruno, S. Baraldo, M. Saetta, M. R.  
959 Bonsignore, A. James, Reduced apoptosis of CD8+ T-lymphocytes in the airways of smokers with  
960 mild/moderate COPD. *Respir Med*. **105**, 1491–1500 (2011).
- 961 32. J. G. Gribben, G. J. Freeman, V. A. Boussiotis, P. Rennert, C. L. Jellis, E. Greenfield, M.  
962 Barber, V. A. Restivo, X. Ke, G. S. Gray, CTLA4 mediates antigen-specific apoptosis of human T  
963 cells. *PNAS*. **92**, 811–815 (1995).
- 964 33. P. Scheipers, H. Reiser, Fas-independent death of activated CD4+ T lymphocytes induced  
965 by CTLA-4 crosslinking. *PNAS*. **95**, 10083–10088 (1998).
- 966 34. M. Schmidt, G. Sun, M. A. Stacey, L. Mori, S. Mattoli, Identification of circulating  
967 fibrocytes as precursors of bronchial myofibroblasts in asthma. *J Immunol*. **171**, 380–389 (2003).

- 968 35. M. Bivas-Benita, G. O. Gillard, L. Bar, K. A. White, R. J. Webby, A.-H. Hovav, N. L.  
969 Letvin, Airway CD8 + T cells induced by pulmonary DNA immunization mediate protective anti-  
970 viral immunity. *Mucosal Immunology*. **6**, 156–166 (2013).
- 971 36. J. Schyns, Q. Bai, C. Ruscitti, C. Radermecker, S. De Schepper, S. Chakarov, F. Farnir, D.  
972 Pirottin, F. Ginhoux, G. Boeckxstaens, F. Bureau, T. Marichal, Non-classical tissue monocytes and  
973 two functionally distinct populations of interstitial macrophages populate the mouse lung. *Nat*  
974 *Commun.* **10**, 3964 (2019).
- 975 37. J. R. Hurst, J. Vestbo, A. Anzueto, N. Locantore, H. Müllerova, R. Tal-Singer, B. Miller,  
976 D. A. Lomas, A. Agusti, W. Macnee, P. Calverley, S. Rennard, E. F. M. Wouters, J. A. Wedzicha,  
977 Evaluation of COPD Longitudinally to Identify Predictive Surrogate Endpoints (ECLIPSE)  
978 Investigators, Susceptibility to exacerbation in chronic obstructive pulmonary disease. *N Engl J*  
979 *Med.* **363**, 1128–1138 (2010).
- 980 38. K. H. Ely, T. Cookenham, A. D. Roberts, D. L. Woodland, Memory T cell populations in  
981 the lung airways are maintained by continual recruitment. *J. Immunol.* **176**, 537–543 (2006).
- 982 39. S. Takamura, H. Yagi, Y. Hakata, C. Motozono, S. R. McMaster, T. Masumoto, M.  
983 Fujisawa, T. Chikaishi, J. Komeda, J. Itoh, M. Umemura, A. Kyusai, M. Tomura, T. Nakayama, D.  
984 L. Woodland, J. E. Kohlmeier, M. Miyazawa, Specific niches for lung-resident memory CD8+ T  
985 cells at the site of tissue regeneration enable CD69-independent maintenance. *J Exp Med.* **213**,  
986 3057–3073 (2016).
- 987 40. C. M. Freeman, J. L. Curtis, S. W. Chensue, CC chemokine receptor 5 and CXC chemokine  
988 receptor 6 expression by lung CD8+ cells correlates with chronic obstructive pulmonary disease  
989 severity. *Am J Pathol.* **171**, 767–776 (2007).
- 990 41. M. Saetta, S. Baraldo, L. Corbino, G. Turato, F. Braccioni, F. Rea, G. Cavallese, G.  
991 Tropeano, C. E. Mapp, P. Maestrelli, A. Ciaccia, L. M. Fabbri, CD8+ve cells in the lungs of  
992 smokers with chronic obstructive pulmonary disease. *Am J Respir Crit Care Med.* **160**, 711–717  
993 (1999).
- 994 42. I. Dupin, E. Eyraud, É. Maurat, J.-M. Sac-Épée, P. Vallois, Probabilistic Cellular Automata  
995 modeling of intercellular interactions in airways: complex pattern formation in patients with  
996 Chronic Obstructive Pulmonary Disease (2022), (available at <https://hal.archives-ouvertes.fr/hal-03572045>).
- 998 43. A. Løkke, P. Lange, H. Scharling, P. Fabricius, J. Vestbo, Developing COPD: a 25 year  
999 follow up study of the general population. *Thorax.* **61**, 935–939 (2006).
- 1000 44. F. Xu, D. M. Vasilescu, D. Kinose, N. Tanabe, K. W. Ng, H. O. Coxson, J. D. Cooper, T.-  
1001 L. Hackett, S. E. Verleden, B. M. Vanaudenaerde, C. S. Stevenson, M. E. Lenburg, A. Spira, W. C.  
1002 Tan, D. D. Sin, R. T. Ng, J. C. Hogg, The molecular and cellular mechanisms associated with the  
1003 destruction of terminal bronchioles in chronic obstructive pulmonary disease. *European*  
1004 *Respiratory Journal* (2021), doi:10.1183/13993003.01411-2021.
- 1005 45. V. N. Ngo, H. L. Tang, J. G. Cyster, Epstein-Barr virus-induced molecule 1 ligand  
1006 chemokine is expressed by dendritic cells in lymphoid tissues and strongly attracts naive T cells  
1007 and activated B cells. *J. Exp. Med.* **188**, 181–191 (1998).
- 1008 46. U. H. von Andrian, C. R. Mackay, T-cell function and migration. Two sides of the same  
1009 coin. *N. Engl. J. Med.* **343**, 1020–1034 (2000).
- 1010 47. C. R. Mackay, Chemokines: immunology’s high impact factors. *Nat. Immunol.* **2**, 95–101  
1011 (2001).



- 1012 48. M. J. Miller, A. S. Hejazi, S. H. Wei, M. D. Cahalan, I. Parker, T cell repertoire scanning is  
1013 promoted by dynamic dendritic cell behavior and random T cell motility in the lymph node. *Proc.*  
1014 *Natl. Acad. Sci. U.S.A.* **101**, 998–1003 (2004).
- 1015 49. P. Henrot, R. Prevel, P. Berger, I. Dupin, Chemokines in COPD: From Implication to  
1016 Therapeutic Use. *Int J Mol Sci.* **20** (2019), doi:10.3390/ijms20112785.
- 1017 50. T. M. Conlon, G. John-Schuster, D. Heide, D. Pfister, M. Lehmann, Y. Hu, Z. Ertüz, M. A.  
1018 Lopez, M. Ansari, M. Strunz, C. Mayr, I. Angelidis, C. Ciminieri, R. Costa, M. S. Kohlhepp, A.  
1019 Guillot, G. Günes, A. Jeridi, M. C. Funk, G. Beroshvili, S. Prokosch, J. Hetzer, S. E. Verleden, H.  
1020 Alsafadi, M. Lindner, G. Burgstaller, L. Becker, M. Irmeler, M. Dudek, J. Janzen, E. Goffin, R.  
1021 Gosens, P. Knolle, B. Pirotte, T. Stoeger, J. Beckers, D. Wagner, I. Singh, F. J. Theis, M. H. de  
1022 Angelis, T. O'Connor, F. Tacke, M. Boutros, E. Dejardin, O. Eickelberg, H. B. Schiller, M.  
1023 Königshoff, M. Heikenwalder, A. Ö. Yildirim, Inhibition of LT $\beta$ R signalling activates WNT-  
1024 induced regeneration in lung. *Nature.* **588**, 151–156 (2020).
- 1025 51. J. A. Nemzek, C. Fry, B. B. Moore, Adoptive transfer of fibrocytes enhances splenic T-cell  
1026 numbers and survival in septic peritonitis. *Shock.* **40**, 106–114 (2013).
- 1027 52. M. L. Dustin, T-cell activation through immunological synapses and kinapses. *Immunol*  
1028 *Rev.* **221**, 77–89 (2008).
- 1029 53. H. D. Moreau, F. Lemaître, E. Terriac, G. Azar, M. Piel, A.-M. Lennon-Dumenil, P. Bousso,  
1030 Dynamic in situ cytometry uncovers T cell receptor signaling during immunological synapses and  
1031 kinapses in vivo. *Immunity.* **37**, 351–363 (2012).
- 1032 54. M. Kaur, L. J. Smyth, P. Cadden, S. Grundy, D. Ray, J. Plumb, D. Singh, T lymphocyte  
1033 insensitivity to corticosteroids in chronic obstructive pulmonary disease. *Respir Res.* **13**, 20 (2012).
- 1034 55. P. Henrot, F. Beaufiles, M. Thumerel, E. Eyraud, A. Boudoussier, H. Begueret, E. Maurat,  
1035 P.-O. Girodet, R. Marthan, P. Berger, I. Dupin, M. Zysman, Circulating fibrocytes as a new tool to  
1036 predict lung cancer progression after surgery? *Eur Respir J*, 2101221 (2021).
- 1037 56. R. A. Backer, P. Hombrink, C. Helbig, D. Amsen, The Fate Choice Between Effector and  
1038 Memory T Cell Lineages: Asymmetry, Signal Integration, and Feedback to Create Bistability. *Adv*  
1039 *Immunol.* **137**, 43–82 (2018).
- 1040 57. J. T. Chang, V. R. Palanivel, I. Kinjyo, F. Schambach, A. M. Intlekofer, A. Banerjee, S. A.  
1041 Longworth, K. E. Vinup, P. Mrass, J. Oliaro, N. Killeen, J. S. Orange, S. M. Russell, W. Weninger,  
1042 S. L. Reiner, Asymmetric T lymphocyte division in the initiation of adaptive immune responses.  
1043 *Science.* **315**, 1687–1691 (2007).
- 1044 58. G. Chrysofakis, N. Tzanakis, D. Kyriakoy, M. Tsoumakidou, I. Tsiligianni, M.  
1045 Klimathianaki, N. M. Siafakas, Perforin expression and cytotoxic activity of sputum CD8+  
1046 lymphocytes in patients with COPD. *Chest.* **125**, 71–76 (2004).
- 1047 59. P. J. Barnes, Inflammatory mechanisms in patients with chronic obstructive pulmonary  
1048 disease. *J Allergy Clin Immunol.* **138**, 16–27 (2016).
- 1049 60. G. Hodge, J. Nairn, M. Holmes, P. N. Reynolds, S. Hodge, Increased intracellular T helper  
1050 1 proinflammatory cytokine production in peripheral blood, bronchoalveolar lavage and  
1051 intraepithelial T cells of COPD subjects. *Clin Exp Immunol.* **150**, 22–29 (2007).
- 1052 61. M. W. Lethbridge, D. M. Kemeny, J. C. Ratoff, B. J. O'Connor, C. M. Hawrylowicz, C. J.  
1053 Corrigan, A novel technique to explore the functions of bronchial mucosal T cells in chronic  
1054 obstructive pulmonary disease: application to cytotoxicity and cytokine immunoreactivity. *Clin Exp*  
1055 *Immunol.* **161**, 560–569 (2010).

- 1056 62. S. Mukhopadhyay, J. R. Hoidal, T. K. Mukherjee, Role of TNFalpha in pulmonary  
1057 pathophysiology. *Respir Res.* **7**, 125 (2006).
- 1058 63. L. K. A. Lundblad, J. Thompson-Figueroa, T. Leclair, M. J. Sullivan, M. E. Poynter, C. G.  
1059 Irvin, J. H. T. Bates, Tumor Necrosis Factor- $\alpha$  Overexpression in Lung Disease. *Am J Respir Crit*  
1060 *Care Med.* **171**, 1363–1370 (2005).
- 1061 64. F. Velotti, I. Barchetta, F. A. Cimini, M. G. Cavallo, Granzyme B in Inflammatory Diseases:  
1062 Apoptosis, Inflammation, Extracellular Matrix Remodeling, Epithelial-to-Mesenchymal Transition  
1063 and Fibrosis. *Front Immunol.* **11**, 587581 (2020).
- 1064 65. B. D. Williamson, E. A. Carswell, B. Y. Rubin, J. S. Prendergast, L. J. Old, Human tumor  
1065 necrosis factor produced by human B-cell lines: synergistic cytotoxic interaction with human  
1066 interferon. *PNAS.* **80**, 5397–5401 (1983).
- 1067 66. J. L. Wright, H. Tai, R. Wang, X. Wang, A. Churg, Cigarette smoke upregulates pulmonary  
1068 vascular matrix metalloproteinases via TNF-alpha signaling. *Am J Physiol Lung Cell Mol Physiol.*  
1069 **292**, L125-133 (2007).
- 1070 67. Y. Chang, J. Nadigel, N. Boulais, J. Bourbeau, F. Maltais, D. H. Eidelman, Q. Hamid, CD8  
1071 positive T cells express IL-17 in patients with chronic obstructive pulmonary disease. *Respiratory*  
1072 *Research.* **12**, 43 (2011).
- 1073 68. H. Hayashi, A. Kawakita, S. Okazaki, M. Yasutomi, H. Murai, Y. Ohshima, IL-17A/F  
1074 modulates fibrocyte functions in cooperation with CD40-mediated signaling. *Inflammation.* **36**,  
1075 830–838 (2013).
- 1076 69. J. J. Pothen, M. E. Poynter, J. H. T. Bates, A computational model of unresolved allergic  
1077 inflammation in chronic asthma. *Am J Physiol Lung Cell Mol Physiol.* **308**, L384–L390 (2015).
- 1078 70. R. Saunders, H. Kaul, R. Berair, S. Gonem, A. Singapuri, A. J. Sutcliffe, L. Chachi, M. S.  
1079 Biddle, D. Kaur, M. Bourne, I. D. Pavord, A. J. Wardlaw, S. H. Siddiqui, R. A. Kay, B. S. Brook,  
1080 R. H. Smallwood, C. E. Brightling, DP2 antagonism reduces airway smooth muscle mass in asthma  
1081 by decreasing eosinophilia and myofibroblast recruitment. *Sci Transl Med.* **11** (2019),  
1082 doi:10.1126/scitranslmed.aao6451.
- 1083 71. S. Takamura, S. Kato, C. Motozono, T. Shimaoka, S. Ueha, K. Matsuo, K. Miyauchi, T.  
1084 Masumoto, A. Katsushima, T. Nakayama, M. Tomura, K. Matsushima, M. Kubo, M. Miyazawa,  
1085 Interstitial-resident memory CD8+ T cells sustain frontline epithelial memory in the lung. *Journal*  
1086 *of Experimental Medicine.* **216**, 2736–2747 (2019).
- 1087 72. M. M. Hufford, T. S. Kim, J. Sun, T. J. Braciale, Antiviral CD8+ T cell effector activities  
1088 in situ are regulated by target cell type. *J Exp Med.* **208**, 167–180 (2011).
- 1089 73. Global Initiative for Chronic Obstructive Lung Disease (GOLD). Global Strategy for the  
1090 Diagnosis, Management, and Prevention of Chronic Obstructive Pulmonary Disease. GOLD, 2022.  
1091 Available from: <https://goldcopd.org/2022-gold-reports-2/>  
1092 Date last accessed: October 1, 2022.
- 1093
- 1094 74. J. C. Hogg, F. Chu, S. Utokaparch, R. Woods, W. M. Elliott, L. Buzatu, R. M. Cherniack,  
1095 R. M. Rogers, F. C. Sciurba, H. O. Coxson, P. D. Paré, The nature of small-airway obstruction in  
1096 chronic obstructive pulmonary disease. *N Engl J Med.* **350**, 2645–2653 (2004).
- 1097 75. C. A. Schneider, W. S. Rasband, K. W. Eliceiri, NIH Image to ImageJ: 25 years of image  
1098 analysis. *Nat Methods.* **9**, 671–675 (2012).

- 1099 76. M. Hasegawa, Y. Nasuhara, Y. Onodera, H. Makita, K. Nagai, S. Fuke, Y. Ito, T. Betsuyaku,  
1100 M. Nishimura, Airflow Limitation and Airway Dimensions in Chronic Obstructive Pulmonary  
1101 Disease. *Am J Respir Crit Care Med.* **173**, 1309–1315 (2006).
- 1102 77. P. Hombrink, C. Helbig, R. A. Backer, B. Piet, A. E. Oja, R. Stark, G. Brassler, A. Jongejan,  
1103 R. E. Jonkers, B. Nota, O. Basak, H. C. Clevers, P. D. Moerland, D. Amsen, R. A. W. van Lier,  
1104 Programs for the persistence, vigilance and control of human CD8+ lung-resident memory T cells.  
1105 *Nat. Immunol.* **17**, 1467–1478 (2016).
- 1106 78. L. Antonioli, C. Blandizzi, P. Pacher, M. Guilliama, G. Haskó, Quorum sensing in the  
1107 immune system. *Nat Rev Immunol.* **18**, 537–538 (2018).
- 1108

## 1109 **Acknowledgments**

1110 We thank the study participants and the staff of the Thoracic Surgery, Radiology, Pathology,  
1111 Respiratory, Lung Function Testing departments from the University Hospital of Bordeaux  
1112 (Bordeaux, France), Isabelle Goasdoue, Isabelle Bernis, Natacha Robert, Virginie Niel, and  
1113 Marine Servat from the clinical investigation center for technical assistance, and Atika  
1114 Zouine and Vincent Pitard for technical assistance at the Flow cytometry facility (CNRS  
1115 UMS 3427, INSERM US 005, Univ. Bordeaux, F-33000 Bordeaux, France), Christel  
1116 Poujol, Sébastien Marais and Fabrice Cordelières for help with imaging and image analysis  
1117 et the Bordeaux Imaging Centre (BIC; Bordeaux, France). Microscopy was performed at  
1118 BIC, a service unit of the CNRS-INSERM and Bordeaux University, a member of the  
1119 national BioImaging infrastructure of France supported by the French National Research  
1120 Agency (ANR-10-INBS-04).

1121

1122 **Funding:** The project was funded by :

1123 the “Fondation de l’Université de Bordeaux” (Fonds pour les maladies chroniques  
1124 nécessitant une assistance médico-technique FGLMR/AVAD) (ID)

1125 the “Agence Nationale de la Recherche” (ANR-21-CE18-0001-01) (ID)

1126 AstraZeneca (an unrestricted grant to PB).

1127 The COBRA cohort was funded by AstraZeneca, Chiesi, Glaxo-SmithKline, Novartis and

1128 Roche.

1129

### 1130 **Author contributions:**

1131 Conceptualization: PV, CCB, PB, ID

1132 Methodology: EE, EM, PH, MZ, HB, POG, MT, RHC, FL, PV, CCB, PB, ID

1133 Software: JMSE, PV, FL

1134 Formal analysis: EE, EM, JMSE, PV, ID

1135 Investigation: EE, EM, JMSE, PH, MZ, PE, TT, MT, RHC, PV, CCB, ID

1136 Visualization: EE, EM, JMSE, PH, ID

1137 Supervision: ID

1138 Writing—original draft: EE, ID

1139 Writing—review & editing: EE, PH, RM, PV, CCB, PB, ID  
1140

1141 **Competing interests:** PB, POG, ID have a patent (EP N°3050574: Use of plerixafor for  
1142 treating and/or preventing acute exacerbations of chronic obstructive pulmonary disease)  
1143 granted.

1144 MZ reports grants from AstraZeneca ; grants “Fondation Bordeaux Université,” with  
1145 funding from "Assistance Ventilatoire à Domicile" (AVAD) and "Fédération Gironde de  
1146 Lutte contre les Maladies Respiratoires" (FGLMR) and personal fees from AstraZeneca,  
1147 Boehringer Ingelheim, Novartis, Chiesi, GlaxoSmithKline and non-financial support Lilly  
1148 outside the submitted work;

1149 POG reports grants, personal fees and non-financial support from AstraZeneca, personal  
1150 fees and non-financial support from Chiesi, personal fees and non-financial support from  
1151 GlaxoSmithKline, personal fees and non-financial support from Novartis, personal fees and  
1152 non-financial support from Sanofi, outside the submitted work;

1153 PB reports grants from AstraZeneca, Glaxo-Smith-Kline, Novartis, Chiesi, which support  
1154 COBRA during the conduct of the study; grants and personal fees from AstraZeneca,  
1155 BoehringerIngelheim, Novartis, personal fees and non-financial support from Chiesi,  
1156 Sanofi, Menarini, outside the submitted work;

1157 ID and PH report grants from the “Fondation Bordeaux Université,” with funding from  
1158 "Assistance Ventilatoire à Domicile" (AVAD) and "Fédération Gironde de Lutte contre  
1159 les Maladies Respiratoires" (FGLMR) during the conduct of the study.

1160  
1161 All other authors declare they have no competing interests.  
1162

1163 **Data and materials availability:** All data needed to evaluate the conclusions are present  
1164 in the paper, the Supplementary Materials, and/or the deposited data. The customized  
1165 ImageJ plugin used to perform Delaunay triangulation and cluster quantification is available  
1166 here:

1167 [https://github.com/flevet/Delaunay\\_clustering\\_ImageJ](https://github.com/flevet/Delaunay_clustering_ImageJ)

1168 A complete version of the code for launching the simulations associated to control and  
1169 COPD dynamics can be downloaded from the following site:

1170 <https://plmbox.math.cnrs.fr/d/49bcbc1db63a4654be7e/>



1171 **Figures**  
1172

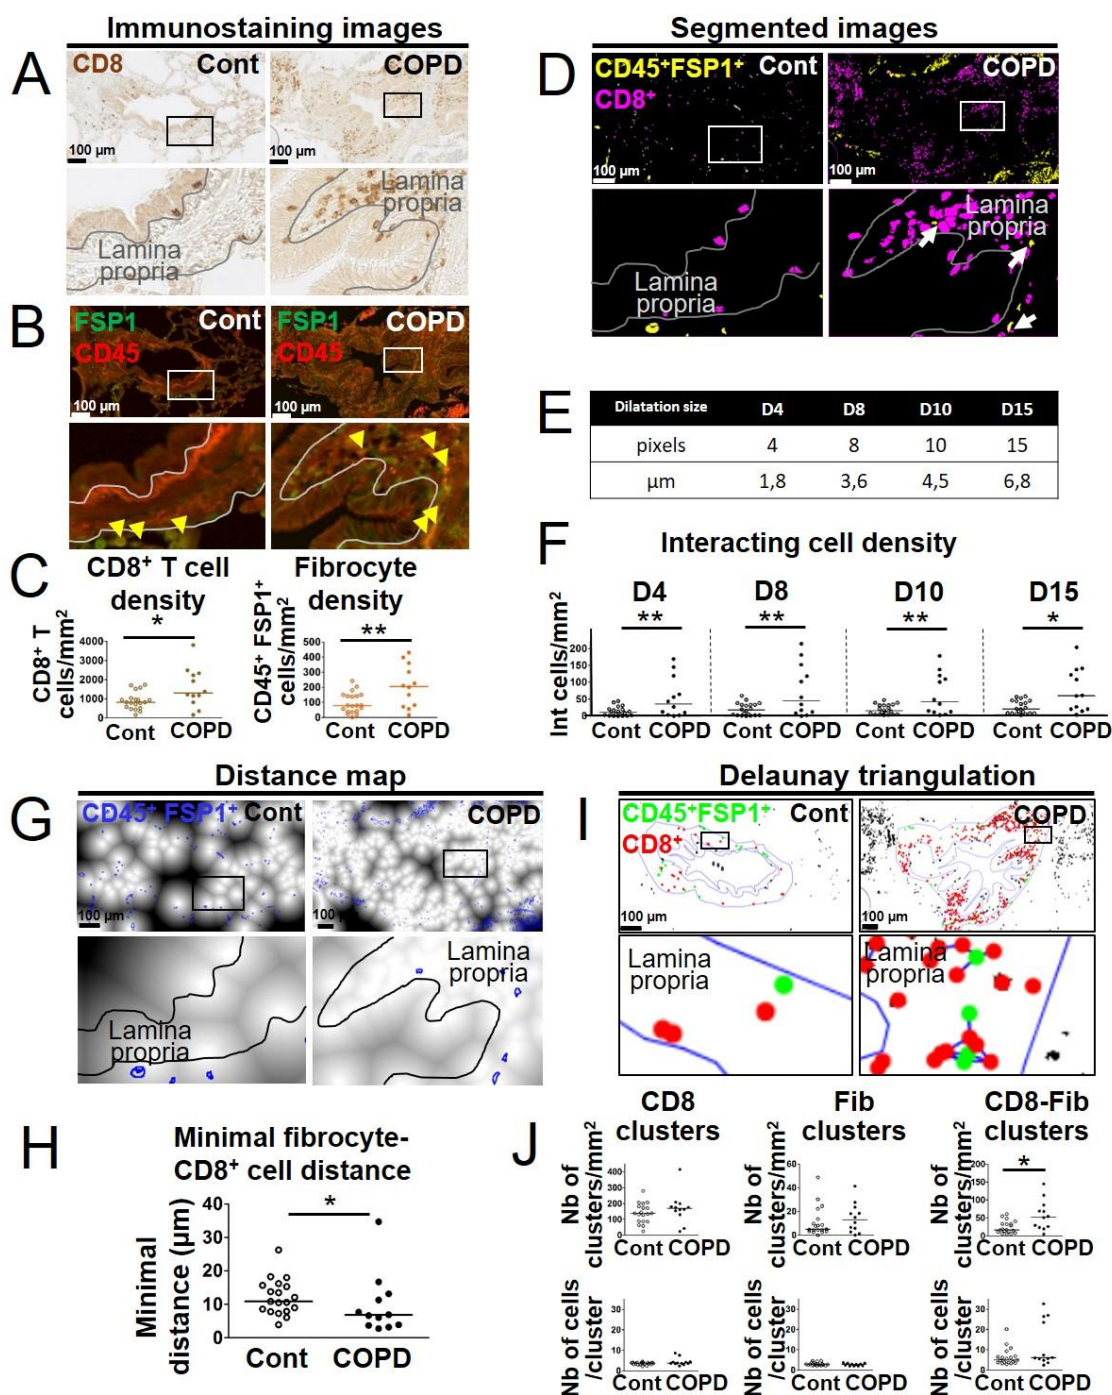

1173  
1174  
1175  
1176  
1177  
1178  
1179  
1180  
1181  
1182  
1183

**Fig. 1. Increased interactions between CD8<sup>+</sup> T cells, CD45<sup>+</sup> FSP1<sup>+</sup> cells in distal airways of COPD patients.** (A, B) Representative stainings of CD8 (brown, A), CD45 (red, B) and FSP1 (green, B) in distal bronchial tissue specimens from a control subject (left) and a COPD patient (right). The yellow arrowheads indicate fibrocytes, defined as CD45<sup>+</sup> FSP1<sup>+</sup> cells. (C) Quantification of CD8<sup>+</sup> T cells and fibrocyte densities (normalized by the sub-epithelial area) in one specimen/patient. (D) Merged segmented images for CD8 and CD45-FSP1 staining, showing CD8<sup>+</sup> T cells and CD45<sup>+</sup> FSP1<sup>+</sup> cells respectively in magenta and yellow. The white arrows indicate interacting cells, detected by dilatation of CD8 positive particle. (E) Table showing the correspondence between dilatations in pixels and  $\mu$ m. F, Quantification of interacting cells densities (normalized by the sub-epithelial area) in one

1184 specimen/patient, using the different dilatations sizes (**E**). (**G**) Distance maps built from the  
1185 binary image produced from CD8 staining, with FSP1<sup>+</sup> CD45<sup>+</sup> cells (blue outlines). (**H**)  
1186 Quantification of the mean minimal distances between fibrocyte and CD8<sup>+</sup> T cells in one  
1187 specimen/patient. (**I**) Cluster analysis performed by Delaunay triangulation on segmented  
1188 images for CD8 and CD45-FSP1 staining, followed by the application of a threshold value  
1189 (40  $\mu$ m) above which connections are not kept. CD8<sup>+</sup> T cells and fibrocytes appear  
1190 respectively with green and red dots, connections are shown in blue. (**J**) First row: densities  
1191 of clusters containing exclusively CD8<sup>+</sup> T cells (“CD8 clusters”), fibrocytes (“Fib clusters”)  
1192 and both cell types (“CD8-Fib clusters”) normalized by the sub-epithelial area) in one  
1193 specimen/patient. Second row: mean number of cells by cluster. (**C, F, H, J**) The medians  
1194 are represented as horizontal lines. \*: P<0.05, \*\*:P<0.01; \*\*\*: P<0.001. unpaired t-tests or  
1195 Mann Whitney tests.

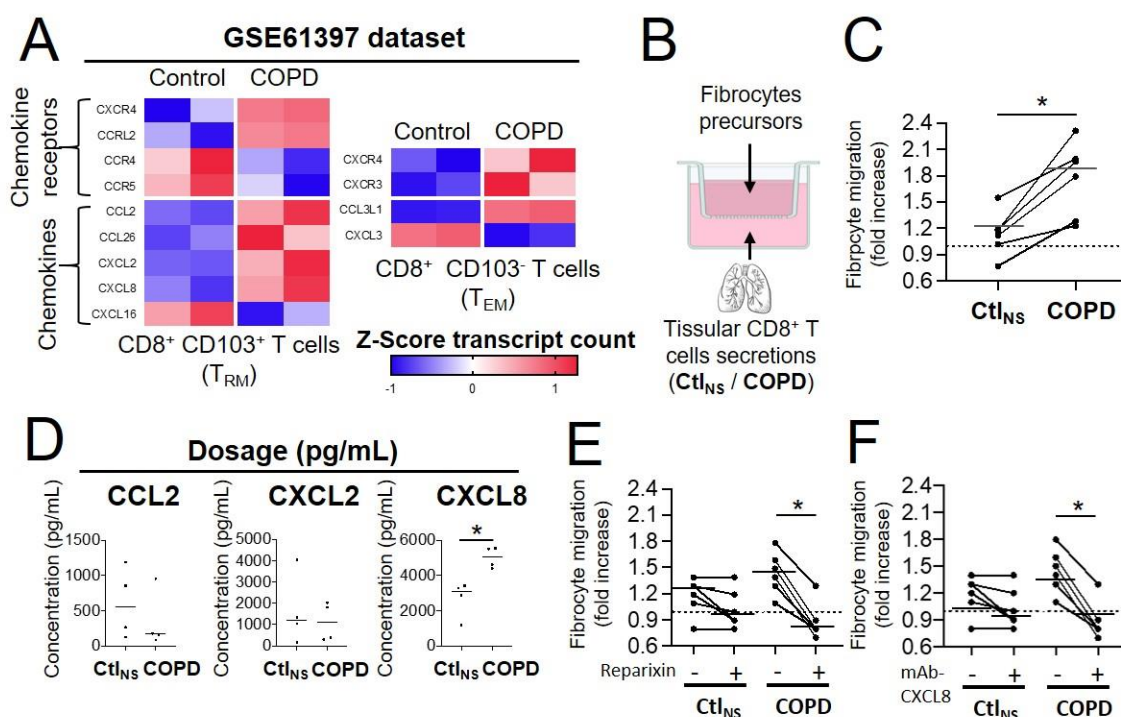

**Fig. 2. CD8<sup>+</sup> T cells from COPD tissue have increased chemoattractive properties for fibrocytes.** (A) Heatmaps showing the expression of differentially expressed genes with p-value<0.05 of chemokines and chemokine receptors in resting tissular tissue resident memory T-cells (T<sub>RM</sub>) and effector memory T-cells (T<sub>EM</sub>) from patients with COPD (n=2 independent samples) in comparison with control subjects (n=2 independent samples) (GEO accession GSE61397). Expression values are expressed as Z-score transformed transcript count. (B) Migration experiment design. (C) Migration of fibrocytes from patients with COPD in response to CD8<sup>+</sup> T cells supernatants from control subjects (Ctl<sub>NS</sub>) or COPD patients (COPD). (D) CCL2, CXCL2 and CXCL8 levels in CD8<sup>+</sup> T cells supernatants from non-smoking control subjects (Ctl<sub>NS</sub>) or patients with COPD (COPD) using BioPlex (CCL2, CXCL2) or ELISA (CXCL8). \* P < 0.05, Mann–Whitney test. (E-F), Migration of fibrocytes from patients with COPD in response to CD8<sup>+</sup> T cells supernatants from control subjects (Ctl<sub>NS</sub>) or COPD patients (COPD), in the presence of 200nM Reparixin (+) or corresponding vehicle (-) (E), and in the presence of 1μg/mL blocking antibody for CXCL8 (+) or control antibody (-) (F). \* P < 0.05, Wilcoxon matched pairs test.

1196  
1197  
1198  
1199  
1200  
1201  
1202  
1203  
1204  
1205  
1206  
1207  
1208  
1209  
1210  
1211



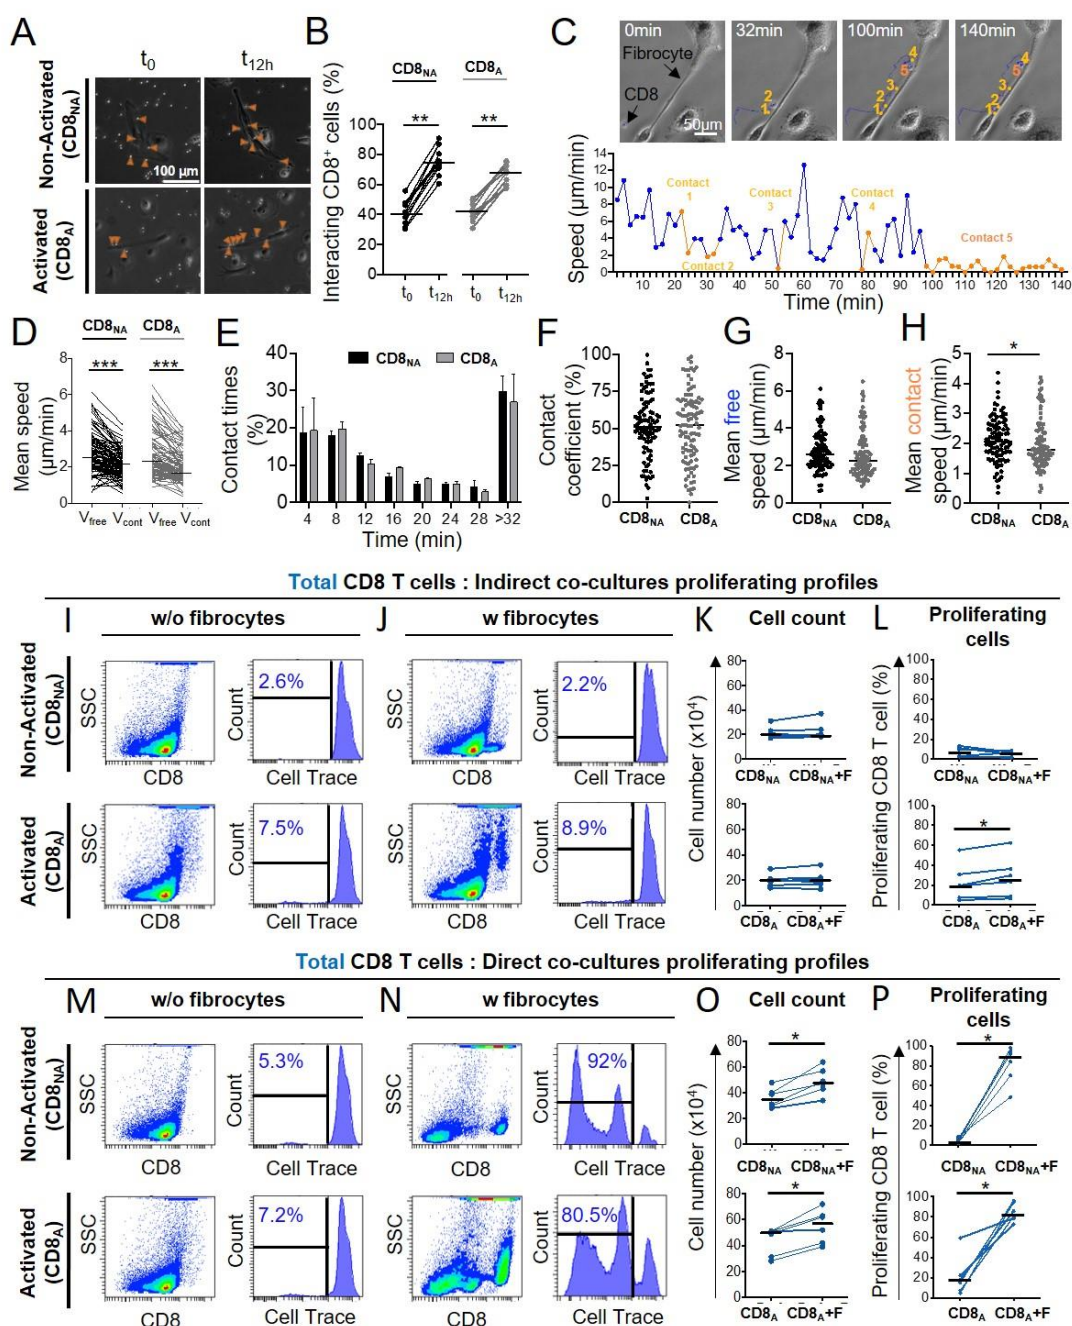

**Fig. 3. CD8<sup>+</sup> T cell repeatedly contact fibrocytes and this contact greatly enhances CD8<sup>+</sup> T cell proliferation.** Prior to co-culture, CD8<sup>+</sup> T cells have been either non-activated (“CD8<sub>NA</sub>”) or activated (“CD8<sub>A</sub>”). (A) Representative brightfield images of co-culture between CD8<sup>+</sup> T cells and fibrocytes at the initial state of the acquisition (t<sub>0</sub>) and after 12 hours (t<sub>12h</sub>) in both conditions of activation. The orange arrowheads indicate CD8<sup>+</sup> T cells (bright round-shaped cells) in contact with fibrocytes (elongated adherent cells). (B) Quantifications of the proportion of fibrocyte-interacting CD8<sup>+</sup> T cells at t<sub>0</sub> and t<sub>12h</sub> in both conditions of activation. (C) Top panel: typical CD8<sup>+</sup> T cells trajectory (blue) relatively to a fibrocyte (elongated adherent cell) for a period of 140 min. Bottom panel: speed (μm/min) over time for the tracked CD8<sup>+</sup> T cell. Short-lived (<12 min, n=4) and longer-lived (>32 min, n=1) contacts are represented respectively in light and dark orange. (D) Comparison of the mean speed of individual CD8<sup>+</sup> T cells measured in the absence (“V<sub>free</sub>”) or presence (“V<sub>cont</sub>”) of contact with fibrocytes in both conditions of activation. (E) Mean frequency

1212  
1213  
1214  
1215  
1216  
1217  
1218  
1219  
1220  
1221  
1222  
1223  
1224  
1225  
1226

1227 distributions of contact time duration (with 4 min binning) between CD8<sup>+</sup> T cells and  
1228 fibrocytes for CD8<sub>NA</sub> (black) and CD8<sub>A</sub> (gray). Error bars indicate standard error of the  
1229 mean. **(F-H)** Dot plots representing spatiotemporal variables measured for each individual  
1230 CD8<sup>+</sup> T cell tracked over 12h. Each dot represents one cell. **(F)** Contact coefficient. **(G)**  
1231 Mean speed of CD8<sup>+</sup> T cells measured in the absence of contact with fibrocytes (“Mean free  
1232 speed”). **(H)** Mean speed of CD8<sup>+</sup> T cells measured in the presence of contact with  
1233 fibrocytes (“Mean contact speed”). **(I, J, M, N)** Representative gating strategy for  
1234 identification of CD8<sup>+</sup> T cells without (w/o) fibrocytes **(I, M)** or with (w) fibrocytes **(J, N)**  
1235 in indirect **(I, J)** or direct **(M, N)** co-culture. Left panels: dot plots represent representative  
1236 CD8-PerCP-Cy5-5 fluorescence (y-axis) versus side scatter (SSC, x-axis) of non-adherent  
1237 cells removed from the culture. Right panels: histograms represent representative cell count  
1238 (y-axis) versus Cell Trace-Pacific Blue fluorescence (x-axis). The distinct fluorescence  
1239 peaks correspond to the different generations of CD8<sup>+</sup> T cells. The gate and the percentage  
1240 indicate cells that have proliferated. **(K, O)** Comparison of manual count of non-adherent  
1241 cells removed from co-culture without fibrocyte (“CD8”) and with fibrocyte (“CD8+F”). **L,**  
1242 **(P)** Comparison of quantifications of CD8<sup>+</sup> T cells that have proliferated, removed from co-  
1243 culture without fibrocyte (“CD8”) and with fibrocyte (“CD8+F”). **(B, D, F, G, H, K, L, O,**  
1244 **P)** Medians are represented as horizontal lines. \* P < 0.05, \*\* P < 0.01, \*\*\* P < 0.001. **(B,**  
1245 **D, K, L, O, P)** Wilcoxon matched pairs test. **(F, G, H)** Mann Whitney tests.

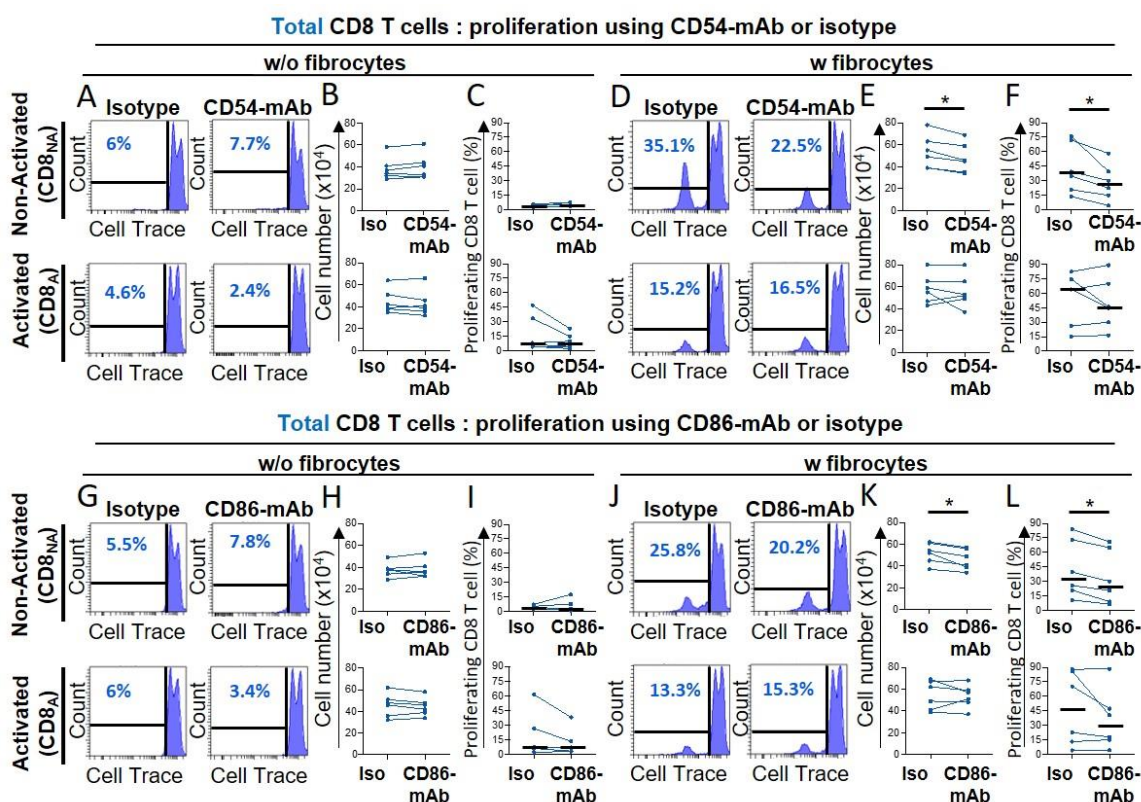

**Fig. 4. Fibrocytes act as a major promoter on CD8<sup>+</sup> T cell proliferation in a CD54 and CD86-dependent manner.** Prior to co-culture, CD8<sup>+</sup> T cells have been either non-activated (“CD8<sub>NA</sub>”) or activated (“CD8<sub>A</sub>”). (A, D, G, J) Representative gating strategy for identification of proliferating CD8<sup>+</sup> T cells without (w/o) fibrocytes (A, G) or with (w) fibrocytes (D, J) using neutralizing CD54-mAb (A, D) or neutralizing CD86-mAb (G, J) and respective control isotype. Histograms represent representative cell count (y-axis) versus Cell Trace-Pacific Blue fluorescence (x-axis). The distinct fluorescence peaks correspond to the different generations of CD8<sup>+</sup> T cells. The gate and the percentage indicate cells that have proliferated. (B, E, H, K) Comparison of manual count of non-adherent cells removed from co-culture treated with neutralizing CD54-mAb or control isotype (Iso) (B, E) and neutralizing CD86-mAb or control isotype (Iso) (H, K). (C, F, I, L) Comparison of quantifications of CD8<sup>+</sup> T cells that have proliferated, removed from co-culture treated with neutralizing CD54-mAb (C, F) or neutralizing CD86-mAb (I, L) and respective control isotype. Medians are represented as horizontal lines. \* P < 0.05, Wilcoxon matched pairs test.

1246  
1247  
1248  
1249  
1250  
1251  
1252  
1253  
1254  
1255  
1256  
1257  
1258  
1259  
1260  
1261  
1262



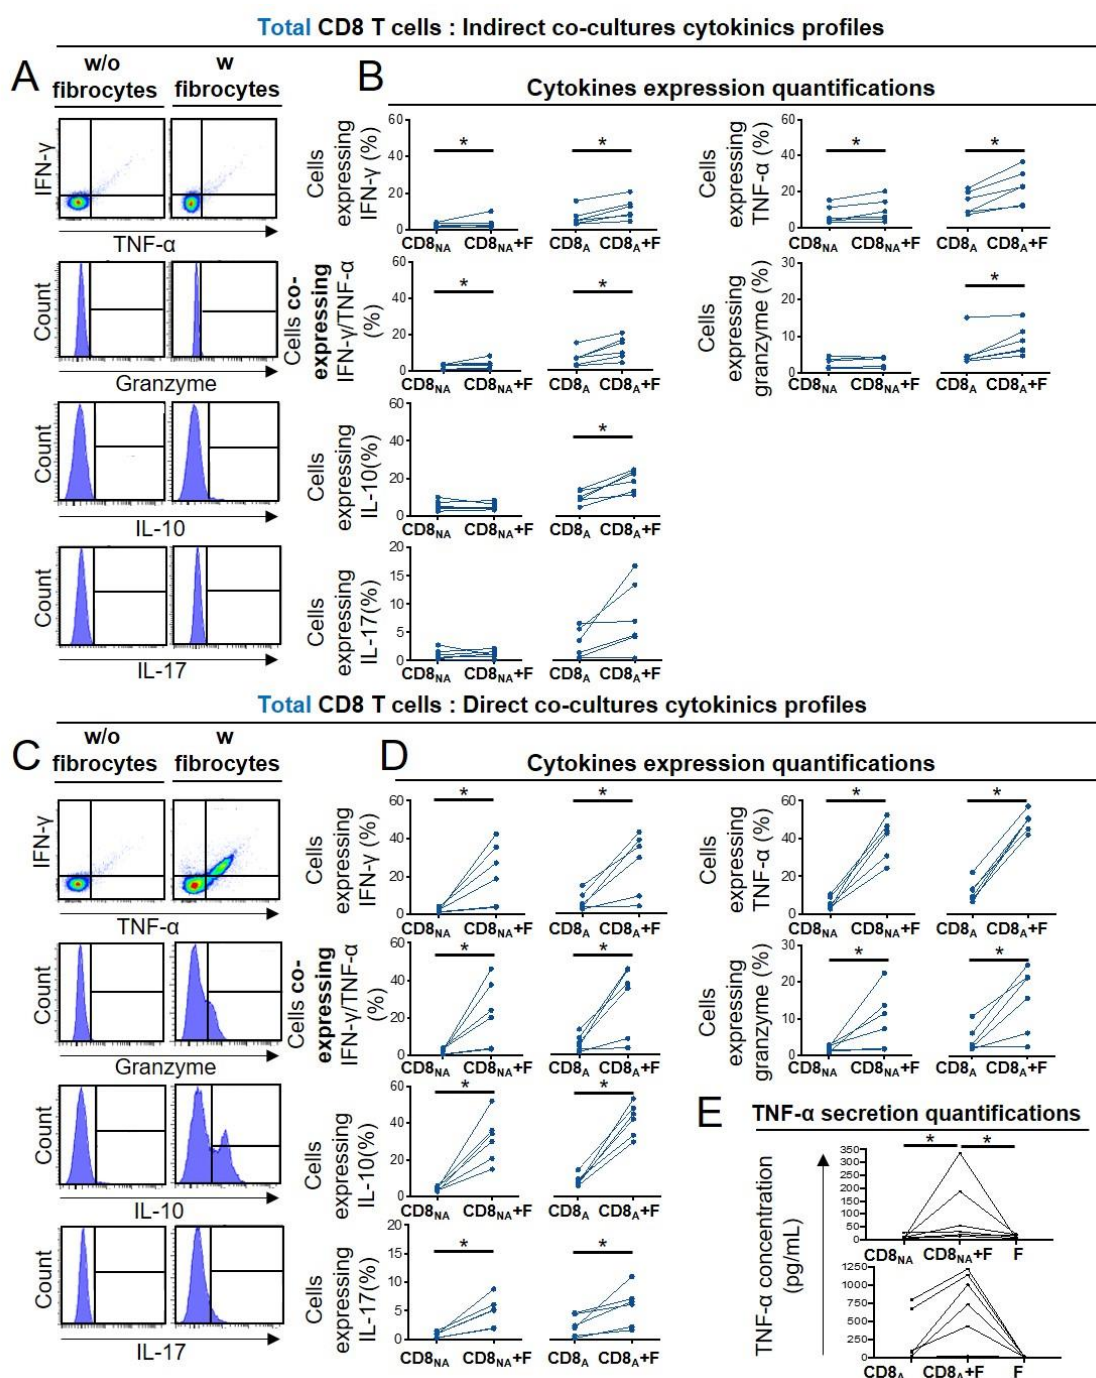

**Fig. 5. Fibrocyte-CD8<sup>+</sup> T cell interactions alter cytokine production.** Prior to co-culture, CD8<sup>+</sup> T cells have been either non-activated (“CD8<sub>NA</sub>”) or activated (“CD8<sub>A</sub>”). (A, C) Representative gating strategy for identification of CD8<sup>+</sup> T cells expressing IFN- $\gamma$ , TNF- $\alpha$ , granzyme, IL-10 and IL17 without (w/o) fibrocytes (left panel) or with (w) fibrocytes (right panel) in indirect (A) or direct (C) co-culture. (B, D) Quantifications of CD8<sup>+</sup> T cells expressing IFN- $\gamma$ , TNF- $\alpha$ , both, granzyme and IL-10 after co-culture without fibrocytes (CD8<sub>NA</sub>/CD8<sub>A</sub>) or with fibrocytes (CD8<sub>NA</sub>/CD8<sub>A</sub>+F) in indirect (B) or direct (D) co-culture. (E) TNF- $\alpha$  concentrations in supernatants from co-cultures without fibrocytes (CD8<sub>NA</sub>/CD8<sub>A</sub>), with fibrocyte (CD8<sub>NA</sub>/CD8<sub>A</sub>+F), and only with fibrocytes (F) as control, for direct co-cultures. \* P < 0.05, Wilcoxon matched pairs test, Friedman test.

1263  
1264  
1265  
1266  
1267  
1268  
1269  
1270  
1271  
1272  
1273

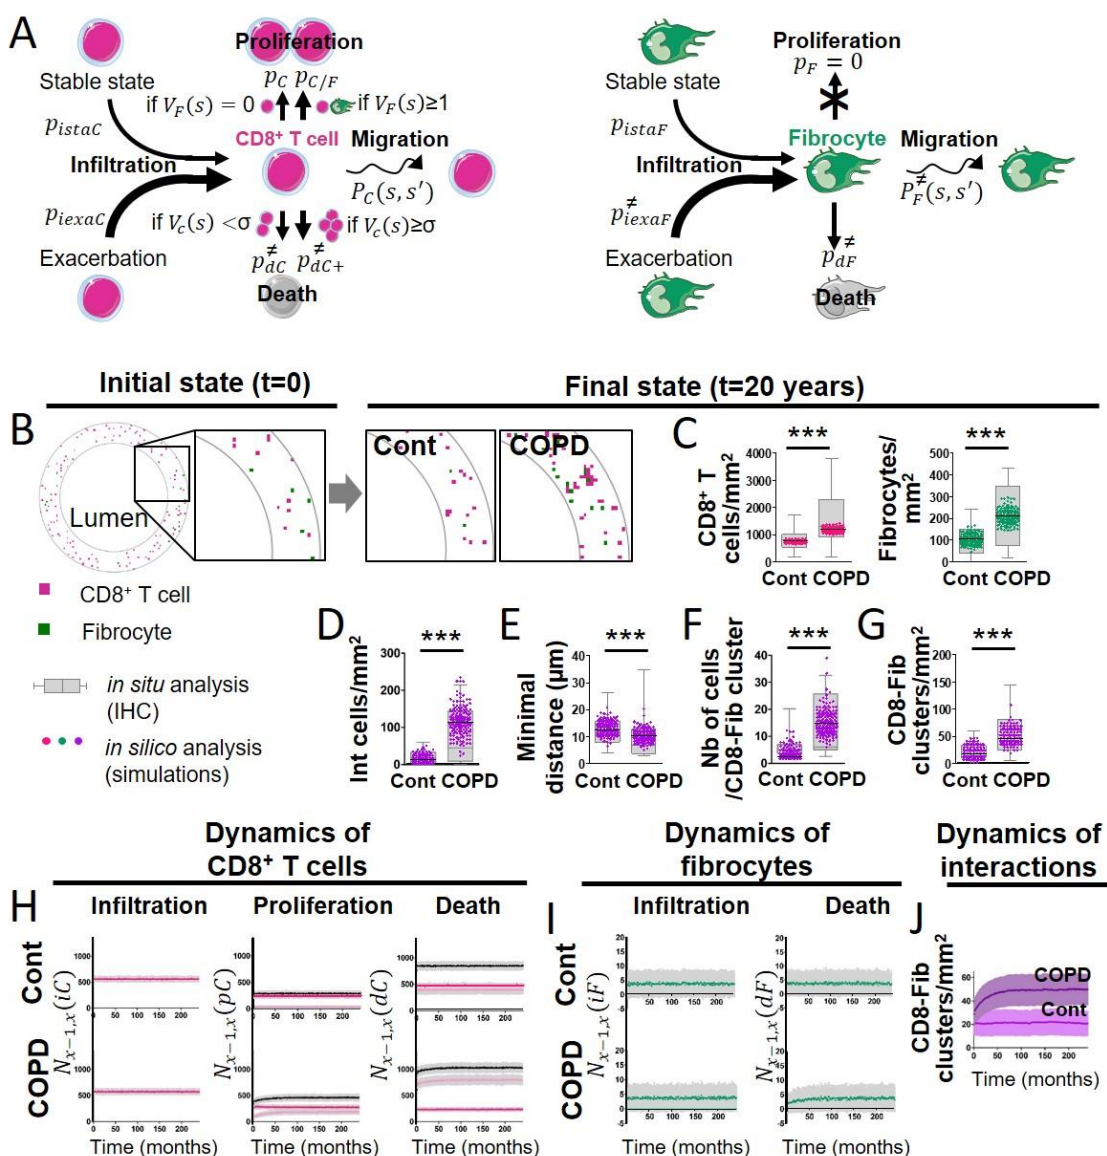

**Fig. 6. A probabilistic cellular automata type model captures the features of the normal and pathological patterns of cell organisation observed in the tissues. (A)** Schematic representation of the probabilities associated with CD8<sup>+</sup> T cells (left panel) and fibrocytes (right panel). For each CD8<sup>+</sup> T cell, we define a "basal" probability  $p_{dC}$  of dying, an increased probability  $p_{dC+}$  of dying when the CD8<sup>+</sup> T cell has many other CD8<sup>+</sup> T cells in its neighbourhood, a "basal" probability  $p_C$  of dividing, an increased probability  $p_{C/F}$  of dividing when the CD8<sup>+</sup> T cell has fibrocytes in its neighbourhood, a probability  $P_C(s, s')$  of moving from a site  $s$  to a neighboring site  $s'$ , a probability  $p_{istaC}$  to be infiltrated at the stable state and a probability  $p_{iexaC}$  to be infiltrated during exacerbation. For each fibrocyte, we define a probability  $p_{dF}$  of dying, a probability  $p_F$  of dividing, a probability  $P_F(s, s')$  of moving from a site  $s$  to a neighboring site  $s'$ , a probability  $p_{istaF}$  to be infiltrated at the stable state and a probability  $p_{iexaF}$  to be infiltrated during exacerbation. The  $\neq$  symbol indicates parameters whose numerical value differs from control to COPD situation. **(B)** Selected representative pictures for initial state and final states after 20 years of control and COPD dynamics. Images surrounded by black squares: higher magnifications of peribronchial area. CD8<sup>+</sup> T cells and fibrocytes are represented respectively by pink and green squares. **(C)** CD8<sup>+</sup> T cells (left) and fibrocyte (right) densities. **(D)** Interacting cells densities of interacting cells. **(E)** Mean minimal distances between fibrocyte and CD8<sup>+</sup> T

1274  
1275  
1276  
1277  
1278  
1279  
1280  
1281  
1282  
1283  
1284  
1285  
1286  
1287  
1288  
1289  
1290  
1291  
1292

1293 cells. **(F)** CD8<sup>+</sup> T cells-fibrocytes-containing clusters (“CD8-Fib clusters”) densities. **(G)**  
1294 mean number of cells by CD8-Fib clusters. **(C-G)**, n=160 simulations for each situation.  
1295 The medians are represented as horizontal lines. The equivalent measurements measured on  
1296 patient’s tissues are represented by gray boxes (25<sup>th</sup> to the 75<sup>th</sup> percentile) and whiskers (min  
1297 to max). \*\*\*: P<0.001. unpaired t-tests or Mann-Whitney tests. **(H, I)** Mean kinetics of the  
1298 populations of CD8<sup>+</sup> T cells and fibrocytes in control and COPD situation *in silico*. Standard  
1299 deviations are indicated in gray, n=160 simulations. Left panels:  $N_{x-1,x}(iC)$  and  $N_{x-1,x}(iF)$   
1300 are the number of CD8<sup>+</sup> T cells (resp. fibrocytes) that have infiltrated the peribronchial area  
1301 for the month  $x$ , relatively to the surface of interest. For fibrocytes, the infiltration at the  
1302 stable state and during exacerbation are indicated respectively in green and light green. For  
1303 control situation, there is no infiltration by exacerbation. Middle panels:  $N_{x-1,x}(pC)$  is the  
1304 number of CD8<sup>+</sup> T cells that have proliferated for the month  $x$ , relatively to the surface of  
1305 interest. Basal duplication, fibrocyte-induced duplication and total duplication are indicated  
1306 respectively in pink, light pink and black. Right panels:  $N_{x-1,x}(dC)$  and  $N_{x-1,x}(dF)$  are the  
1307 number of CD8<sup>+</sup> T cells (resp. fibrocytes) that have died for the month  $x$ , relatively to the  
1308 surface of interest. For CD8<sup>+</sup> T cells, basal death, T cell-induced death and total death are  
1309 indicated respectively in pink, light pink and black. **(J)** Graphs showing the variations of  
1310 the mean densities of CD8-Fib clusters over time in control (light purple) and COPD  
1311 situation (dark purple).  
1312  
1313
